# Supplementary material for: A novel risk factor of contrast associated acute kidney injury in patients after enhanced computed tomography: a retrospective study
Source: PeerJ. 2022 Oct 20;10:e14224. doi: 10.7717/peerj.14224 (PMC9588300; doi:10.7717/peerj.14224)
Supplement: Supplemental Information 1 [file peerj-10-14224-s001.xls]

## Sheet: Sheet1
	Group	Weight	Contrast valume	Diabetes	Hypetension	CAD	ACEI/ARB	Statin	Smoking(1yes,0no)	Gender(女0男1)	Age	Age>65years old(1:yes,0:NO)	baseline Serum creatinine	eGFR(CKD-EPI)	eGFR<60(1)	Serum creatinine(after enhanced CT)	Hemoglobin	Hemoglobin<120g/L(1:yes,0:N0)	Red cell distribution width	RDW>15(1:yes,0:No)	Red blood cell count	Hematocrit	White blood cell count	neutrophil	lymphocyte	monocyte	Eosinocyte	Basophil	platelet	NLR	PLR	Total serum protein	Albumin	Alb<35g/L(1:yes,0:No)	Total cholesterol	Triglyceride	LDL cholesterol	HDL cholesterol	Uric acid	Glucose	potassiun
1	0	51	76.5	0	0	0	0	0	0	0	40	0	49	117.403	0	49	129	0	11.8	0	4.58	0.421	9.1	6.634	1.693	0.546	0.2	0.027	207	3.91849	122.268	64.1	40.1	0	4.73	0.87	2.91	1.24	279	7	3.51
2	0	48	72	0	0	0	0	0	0	0	76	1	66	78.1018	0	70	118	1	13.2	0	4.32	0.39	8.1	4.05	2.738	0.559	0.721	0.032	249	1.47918	90.9423	72.7	40.9	0	6.52	2.37	4.51	1.14	409	5.6	3.91
3	0	69	103.5	0	0	0	0	0	0	1	38	0	71	113.138	0	89	140	0	11.9	0	4.62	0.462	11	10.263	0.396	0.319	0.011	0.011	244	25.9167	616.162	75.2	46.1	0	5.28	2.6	3.05	0.85	389	7.3	4.43
4	0	52	78	1	1	0	0	0	0	0	49	0	48	110.96	0	62	121	0	13.2	0	4.88	0.404	9.7	5.898	3.191	0.524	0.049	0.039	253	1.84832	79.2855	74.8	42.8	0	4.02	1.41	2.22	1.36	360	6.3	3.44
5	0	65	97.5	1	0	0	0	1	0	1	70	1	105	61.6579	0	131	116	1	13.9	0	4.01	0.353	9.1	6.334	1.556	1.046	0.137	0.027	388	4.07069	249.357	66.1	37.5	0	5.11	0.71	3.24	1.29	406	6.7	3.36
6	0	55.2	82.8	1	1	0	0	0	1	1	77	1	107	57.3755	1	133	112	1	13.1	0	3.65	0.342	8.1	5.694	1.401	0.583	0.348	0.073	256	4.06424	182.727	68.2	37.7	0	2.7	0.66	1.49	0.67	332	4.8	4.14
7	0	56.5	84.75	1	1	0	0	1	0	0	52	0	74	80.502	0	91	123	0	12.6	0	4.16	0.377	9.5	6.527	2.337	0.294	0.333	0.019	257	2.7929	109.97	68	41.6	0	4.11	2.54	2.42	0.7	293	7.9	2.88
8	0	81	121.5	0	1	0	1	0	1	1	47	0	84	94.9118	0	106	141	0	14.9	0	4.77	0.447	7.7	4.959	1.933	0.47	0.293	0.038	139	2.56544	71.9089	72.2	40	0	4.51	4.13	2.46	0.73	560	5.3	2.65
9	0	75.5	113.25	0	0	0	0	0	0	1	52	0	81	95.755	0	105	149	0	13.3	0	5.32	0.443	12.7	8.75	2.527	0.953	0.292	0.178	221	3.4626	87.4555	73.8	38.3	0	7.43	2.66	5.1	0.85	345	5.6	4
10	0	58	87	1	1	0	0	0	0	0	56	0	53	102.248	0	75	130	0	12.5	0	4.72	0.436	5.9	3.339	1.965	0.425	0.142	0.029	241	1.69924	122.646	73.9	46.5	0	5.54	1.78	3.06	1.86	257	7	4.03
11	0	60.8	91.2	1	1	0	0	1	0	0	62	0	58	95.163	0	80	132	0	12.7	0	4.54	0.416	9.5	7.524	1.359	0.551	0.029	0.038	274	5.53642	201.619	78.3	40.4	0	5.43	3.8	3.12	1	424	7.1	2.89
12	0	58.7	88.05	0	0	0	0	0	0	0	58	0	48	104.162	0	88	132	0	13.5	0	4.61	0.43	16.1	13.733	1.819	0.451	0.064	0.032	145	7.54975	79.7141	68	35.4	0	3.87	0.86	2.14	1.35	268	5	3.68
13	0	75	112.5	0	0	0	0	0	0	1	43	0	113	68.2032	0	111	102	1	15.8	1	5.33	0.35	5.1	2.336	2.096	0.449	0.189	0.031	218	1.1145	104.008	65.3	40.2	0	4.17	0.91	2.51	0.83	503	4.9	3.69
14	0	64.5	96.75	0	1	1	0	1	0	0	57	0	66	89.2535	0	85	121	0	13.3	0	4.32	0.383	4.9	1.916	1.994	0.48	0.451	0.059	181	0.960883	90.7723	71.4	38.8	0	5.9	0.53	3.66	1.48	411	5.5	3.71
15	0	40	60	0	0	0	0	0	0	0	73	1	53	90.7384	0	83	132	0	13.7	0	4.72	0.428	4.1	2.296	1.074	0.262	0.447	0.021	270	2.1378	251.397	61.3	36	0	6.02	1.45	3.77	1.76	279	4.4	4.08
16	0	50	75	0	0	0	0	0	0	1	22	0	74	124.461	0	68	142	0	13.8	0	4.76	0.428	11.6	8.48	1.682	0.998	0.394	0.046	237	5.04162	140.904	75.9	50.5	0	3.02	0.35	1.26	1.37	524	5.1	3.86
17	0	64.5	96.75	0	0	0	0	0	1	1	36	0	56	126.495	0	55	120	0	14.8	0	5.21	0.389	6.9	4.692	1.214	0.938	0.048	0.007	116	3.86491	95.5519	85.1	42.3	0	4.17	1.64	2.42	0.79	340	5.4	3.81
18	0	54	81	0	1	0	0	1	0	1	78	1	88	72.1641	0	99	129	0	13.4	0	4.25	0.404	12.3	10.91	0.738	0.627	0	0.025	222	14.7832	300.813	67.6	38.5	0	5.71	0.98	2.99	1.18	238	5	3.21
19	0	63.9	95.85	0	1	0	0	0	0	1	63	0	105	64.7655	0	101	124	0	13	0	4.11	0.358	16.4	15.006	0.754	0.607	0.016	0.016	321	19.9019	425.729	80.2	44.2	0	5.33	0.77	3.47	1.05	700	8.9	3.97
20	0	56	84	0	1	0	0	0	0	1	78	1	76	83.0676	0	73	135	0	13.2	0	4.9	0.405	9.5	6.47	1.397	1.368	0.2	0.067	243	4.63135	173.944	65.3	38.1	0	4.58	2.25	2.46	0.7	222	5	3.45
21	0	55	82.5	0	1	0	1	1	0	0	80	1	84	56.7326	1	80	99	1	15.7	1	4.88	0.318	7.2	4.774	1.793	0.511	0.101	0.022	203	2.66258	113.218	66.4	34.7	1	4.19	1.38	2.47	0.77	286	7	3.75
22	0	69	103.5	0	1	0	1	1	1	1	72	1	82	81.9793	0	83	131	0	13.8	0	4.18	0.398	8.4	5.183	2.192	0.815	0.176	0.034	151	2.36451	68.8869	64.4	36.1	0	4.64	0.97	2.99	0.91	336	7.1	2.83
23	0	68	102	0	0	0	0	0	0	0	44	0	65	99.6097	0	50	114	1	13.6	0	4.32	0.353	7.9	5.522	1.604	0.687	0.047	0.04	357	3.44264	222.569	70.5	37	0	5.41	1.45	2.93	1.18	175	5.7	3.69
24	0	57	85.5	0	0	0	0	0	0	0	66	1	80	66.399	0	75	112	1	13.6	0	4.12	0.368	5.9	3.133	2.136	0.484	0.088	0.059	267	1.46676	125	70.6	30.9	1	5.55	1.14	4	0.62	329	5.3	3.66
25	0	57	85.5	0	0	0	0	0	1	1	50	0	81	97.1098	0	96	142	0	13.3	0	4.79	0.416	6	4.206	1.146	0.582	0.048	0.018	151	3.67016	131.763	72.7	43.6	0	4.22	0.79	2.07	1.73	528	6.6	3.4
26	0	58	87	0	0	0	0	0	0	0	47	0	61	103.998	0	45	132	0	12.7	0	4.17	0.382	6.2	3.379	2.071	0.508	0.211	0.031	342	1.63158	165.138	78.1	43	0	4.98	0.96	3.09	1.46	443	5.6	3.98
27	0	76	114	0	0	0	0	0	0	1	42	0	67	112.657	0	84	158	0	13.4	0	5.44	0.473	7.1	3.713	2.265	0.618	0.412	0.092	296	1.63929	130.684	75.3	44.7	0	4.1	1.58	2.18	1.22	445	3.8	3.26
28	0	85	127.5	0	1	1	0	0	1	1	40	0	337	18.5876	1	346	118	1	14.2	0	4.06	0.341	8.5	5.032	1.776	0.79	0.842	0.059	111	2.83333	62.5	71.8	39.3	0	5.47	1.61	3.43	0.83	575	5	2.65
29	0	69	103.5	0	1	1	1	1	1	1	58	0	70	98.8839	0	87	138	0	12.3	0	4.55	0.417	11.1	8.214	1.92	0.577	0.255	0.133	204	4.27813	106.25	66.1	41.8	0	4.94	2.74	3.78	0.59	371	6	3.55
30	0	66	99	0	0	0	0	0	1	1	48	0	89	87.8841	0	94	155	0	12.7	0	5.27	0.438	12.2	9.382	1.806	0.976	0.012	0.024	242	5.19491	133.998	78.9	49.3	0	5.13	0.7	3.41	1.43	583	6.6	3.97
31	0	65	97.5	0	1	0	0	0	0	1	72	1	79	85.2758	0	75	136	0	13	0	4.75	0.409	5.3	2.3	2.131	0.451	0.329	0.09	271	1.07931	127.17	72.6	41.9	0	5.51	0.83	3.54	1.44	389	6.2	3.64
32	0	63	94.5	0	0	0	0	0	1	1	73	1	96	67.2804	0	70	140	0	13.2	0	4.75	0.406	10.8	8.024	0.821	1.75	0.194	0.011	227	9.77345	276.492	74.9	37.5	0	2.7	2.7	1.18	0.93	241	8.6	3.5
33	0	56	84	0	0	0	0	0	1	1	60	0	79	92.7758	0	84	101	1	12.9	0	3.51	0.298	6.6	3.973	1.96	0.535	0.099	0.033	306	2.02704	156.122	71.4	34.3	1	2.27	0.49	1.44	0.53	251	4.5	3.35
34	0	65	97.5	0	1	0	0	1	0	1	54	0	72	100.531	0	71	148	0	13.3	0	5.29	0.441	7.4	4.107	2.22	0.844	0.207	0.022	187	1.85	84.2342	67.2	41.1	0	4.31	1.92	2.76	0.85	442	5.2	2.85
35	0	71	106.5	0	0	0	0	0	0	0	51	0	51	107.252	0	47	123	0	12.7	0	4	0.391	4	2.62	1.064	0.22	0.068	0.028	227	2.46241	213.346	75.3	43.5	0	5.42	1.13	3.4	1.3	188	5.4	3.87
36	0	65	97.5	0	0	0	0	0	1	1	45	0	56	118.745	0	66	123	0	13.8	0	4.3	0.389	15.5	12.508	1.457	1.379	0.077	0.077	223	8.58476	153.054	65.6	30.2	1	7.29	6.3	4	0.43	204	7.9	3.5
37	0	60	90	0	1	0	0	0	0	1	43	0	80	104.005	0	71	135	0	13	0	4.37	0.42	16.3	13.284	2.005	0.734	0.244	0.033	198	6.62544	98.7531	65.6	35.6	0	5.06	7.27	0.9	1.15	364	6.3	3.05
38	0	46	69	0	0	0	0	0	0	0	40	0	59	110.444	0	46	120	0	13.7	0	4.22	0.382	6.5	3.022	2.542	0.773	0.091	0.071	214	1.18883	84.1857	71.9	39.4	0	3.57	0.66	1.94	1.47	189	4.4	3.27
39	0	60	90	0	0	0	0	1	1	1	73	1	98	65.6239	0	65	129	0	13.8	0	4.27	0.412	8.1	4.717	2.082	1.166	0.13	0.008	233	2.26561	111.912	59.6	34.2	1	5.62	1.02	3.71	1.09	370	4.3	3.48
40	0	60	90	0	0	0	0	0	0	1	29	0	83	109.275	0	89	132	0	15.9	1	6.45	0.43	7.6	3.5	3.1	0.5	0.5	0.1	180	1.12903	58.0645	76.1	44.9	0	3.42	1.42	1.93	1.02	565	4.2	4.03
41	0	67	100.5	0	0	0	0	0	0	1	40	0	60	119.551	0	64	153	0	12.2	0	4.73	0.427	8.3	6.3	1.212	0.739	0.017	0.033	221	5.19802	182.343	76.6	46.9	0	3.88	1.05	1.96	1.18	330	4.9	3.83
42	0	47	70.5	0	0	0	0	0	0	0	78	1	67	75.6247	0	52	114	1	15.1	1	3.98	0.356	8.9	7.147	1.015	0.703	0.009	0.027	119	7.04138	117.241	71.2	44.4	0	4.18	1	2.41	1.08	275	6.4	3.4
43	0	59	88.5	0	1	0	0	0	0	0	42	0	47	117.363	0	50	115	1	12.9	0	4.06	0.355	5.3	3.138	1.526	0.503	0.101	0.032	182	2.05636	119.266	66.4	40.8	0	4.11	0.4	1.99	1.89	194	5.2	2.88
44	0	60.2	90.3	0	1	0	0	1	0	1	78	1	71	85.4238	0	90	132	0	13.7	0	4.7	0.424	7.8	5.585	0.679	0.554	0.983	0.008	233	8.22533	343.152	67.7	37.1	0	5.99	1.12	3.9	1.07	401	4.3	3.16
45	0	51	76.5	0	0	0	0	0	0	0	66	1	65	85.3464	0	62	118	1	12.4	0	3.91	0.35	14	13.034	0.476	0.462	0.014	0.014	233	27.3824	489.496	78.5	40.9	0	5.26	1.52	3.27	0.82	279	16.4	3.86
46	0	59	88.5	0	0	0	0	0	0	1	49	0	105	71.4586	0	94	91	1	15	0	3.47	0.291	9.6	7.92	1.152	0.432	0.01	0.077	219	6.875	190.104	80.3	27.1	1	3.06	0.87	1.95	0.38	356	6.1	2.83
47	0	59	88.5	0	0	0	0	0	1	1	37	0	74	112.014	0	73	162	0	12.4	0	5.17	0.471	5.6	3.158	1.579	0.571	0.269	0.022	169	2	107.03	80.9	55.5	0	4.91	1.37	2.88	0.93	562	5.6	3.43
48	0	47.3	70.95	0	1	0	0	1	0	0	78	1	74	67.0636	0	79	129	0	13.5	0	4.46	0.397	6.1	3.55	1.61	0.738	0.171	0.03	297	2.20497	184.472	64.5	35.6	0	5.61	0.8	2.58	2.34	275	5.9	3.25
49	0	65	97.5	1	1	0	0	0	0	1	82	1	102	58.6948	1	102	119	1	13.8	0	3.95	0.357	11.2	8.904	0.997	1.042	0.224	0.034	201	8.93079	201.605	73.2	34.9	1	4.34	0.92	2.64	0.68	299	7.5	3.87
50	0	58	87	0	0	0	0	0	0	0	58	0	55	99.6001	0	57	121	0	15.1	1	5.3	0.377	6.2	2.833	2.79	0.428	0.087	0.062	241	1.01541	86.3799	79.7	46.2	0	5.01	0.41	2.49	2.1	233	5.1	3.81
51	0	52	78	0	1	1	1	1	0	0	71	1	92	54.1407	1	86	108	1	12.9	0	3.42	0.322	6.5	3.939	1.43	0.696	0.403	0.033	156	2.75455	109.091	68.7	37.3	0	4.47	0.34	1.98	1.75	410	5.5	4.53
52	0	77.5	116.25	1	0	0	0	0	0	1	31	0	75	116.193	0	74	165	0	13.7	0	5.95	0.481	13.7	10.617	1.918	1.028	0.123	0.014	296	5.53545	154.327	77.1	43	0	11.3	13.51	1.28	0.91	538	12.8	3.46
53	0	60	90	1	1	1	1	1	1	1	74	1	125	48.5556	1	89	145	0	12.7	0	4.56	0.43	10.6	5.289	4.155	0.837	0.254	0.064	196	1.27292	47.1721	70	39.8	0	4.79	3.57	2.5	0.92	466	15.6	3.69
54	0	85	127.5	1	1	0	0	0	0	0	85	1	65	74.6828	0	61	89	1	14.5	0	2.59	0.248	3.5	1.825	0.96	0.485	0	0.03	102	1.90104	106.25	81.3	38.2	0	4.65	1.64	2.58	1.01	305	33	4.12
55	0	75	112.5	0	0	0	0	0	0	1	67	1	120	53.5832	1	121	146	0	12.8	0	4.51	0.429	6.4	3.194	2.458	0.614	0.122	0.013	166	1.29943	67.5346	74.3	47.3	0	5.22	2.02	3.32	0.94	235	5.1	4.13
56	0	48	72	0	0	0	0	0	1	1	41	0	92	88.6868	0	76	111	1	13.5	0	3.28	0.321	4	2.916	0.492	0.292	0.28	0.02	162	5.92683	329.268	68.9	40.7	0	3.73	0.75	2.43	0.79	386	4.3	4.51
57	0	55	82.5	0	1	0	0	1	0	0	78	1	88	54.3887	1	104	101	1	16.1	1	4.8	0.349	9.2	3.643	4.572	0.773	0.129	0.083	303	0.796807	66.273	69.1	36.4	0	3.62	0.82	1.62	1.26	340	3.8	3.68
58	0	60	90	0	0	0	0	0	0	1	47	0	62	112.291	0	82	120	0	13.2	0	4.09	0.377	6.4	3.29	1.766	0.838	0.416	0.09	163	1.86297	92.299	76.7	42.8	0	5.65	1.04	3.45	1.1	360	4.1	3.89
59	0	49	73.5	0	0	0	0	0	0	0	68	1	60	90.2235	0	63	123	0	15.9	1	3.79	0.372	5.5	1.793	3.047	0.605	0.028	0.028	280	0.588448	91.8937	72.9	36	0	5.43	1.19	3.33	1.26	285	4.8	3.97
60	0	65	97.5	1	1	1	1	1	0	1	74	1	111	56.0542	1	112	140	0	14.1	0	5	0.429	7.7	4.997	1.863	0.716	0.092	0.031	220	2.68223	118.089	75.8	39.7	0	5.13	1	3.47	0.96	362	6.2	3.85
61	0	45	67.5	1	1	0	0	1	1	1	80	1	94	65.7033	0	104	122	0	12.5	0	4.1	0.358	7	3.934	1.883	0.721	0.42	0.042	213	2.08922	113.117	68.8	40	0	4.54	0.84	2.37	1.67	172	3.1	2.94
62	0	51	76.5	0	0	0	0	0	1	1	47	0	63	111.555	0	52	86	1	15.8	1	2.27	0.262	4.5	2.659	1.521	0.27	0.018	0.032	44	1.74819	28.9283	80.2	29.9	1	5.16	2.53	3.55	0.51	505	7.4	3.36
63	0	85	127.5	0	0	0	0	1	0	0	77	1	66	77.5551	0	66	125	0	12.9	0	4.28	0.373	6	3.048	2.55	0.294	0.06	0.048	201	1.19529	78.8235	70.2	37.2	0	4.55	0.67	3.17	1.1	346	4.8	3.83
64	0	50	75	0	0	0	0	0	1	1	54	0	99	74.0791	0	100	144	0	12.5	0	5.21	0.441	12.4	8.705	1.026	0.896	0.14	0.032	204	8.48441	198.83	65.3	37.3	0	4.26	1	2.57	1.1	272	4.4	3.55
65	0	59	88.5	0	1	1	0	1	1	1	64	0	62	99.6514	0	60	118	1	13.8	0	4.78	0.365	10.1	7.484	1.727	0.747	0.101	0.04	248	4.33353	143.602	69.9	37.9	0	3.94	1.98	2.15	0.73	326	5.6	3.3
66	0	76	114	1	1	1	0	1	1	1	54	0	129	53.7917	1	128	126	0	16.2	1	5.84	0.409	10.6	6.784	2.406	1.06	0.318	0.032	163	2.81962	67.7473	65.4	37.7	0	4.12	2.34	2.23	1.02	416	7	3.78
67	0	56	84	0	0	0	0	1	0	0	71	1	64	83.9599	0	56	123	0	12.7	0	3.93	0.362	5.1	2.81	1.403	0.765	0.071	0.051	232	2.00285	165.36	67.5	33.4	1	5.26	2.28	3.25	0.52	308	5.4	3.63
68	0	54	81	0	0	0	0	0	0	1	53	0	108	67.1522	0	109	141	0	13.7	0	4.7	0.424	4.7	1.894	2.12	0.564	0.113	0.009	241	0.893396	113.679	79.2	45.3	0	4.71	0.66	2.8	1.32	317	5.1	3.72
69	0	61	91.5	0	1	1	0	1	0	0	61	0	103	50.6677	1	96	114	1	13.5	0	3.42	0.345	5.2	2.475	1.986	0.468	0.239	0.031	179	1.24622	90.1309	70.9	40.4	0	3.4	1.35	1.56	0.78	529	4.1	3.52
70	0	57	85.5	0	0	0	0	0	0	0	43	0	73	87.1781	0	73	101	1	14.3	0	3.3	0.304	13	10.3	1.8	0.8	0.1	0	99	5.72222	55	59.8	30.8	1	4.91	1.06	2.97	1.3	413	4.4	3.68
71	0	63	94.5	0	0	0	0	0	0	1	77	1	76	83.6532	0	78	131	0	12.9	0	3.89	0.405	8.5	6.783	1.173	0.459	0.076	0.009	81	5.78261	69.0537	70.3	43.2	0	3.88	1.41	2.2	1.13	382	6.4	3.78
72	0	66	99	0	1	0	1	0	0	0	54	0	65	92.8526	0	87	85	1	14	0	2.62	0.254	11.3	8.656	1.559	1.04	0	0.045	114	5.55228	73.1238	59.2	30.8	1	3.94	0.95	2.27	1.06	136	8.9	4.2
73	0	63	94.5	0	0	0	0	0	0	0	31	0	56	119.689	0	56	131	0	13.1	0	4.39	0.401	10.3	7.694	1.566	0.7	0.309	0.031	195	4.91315	124.521	76.5	42.2	0	4.84	0.69	2.87	0.98	332	4.9	3.43
74	0	67	100.5	0	0	0	0	0	1	1	60	0	63	101.819	0	64	115	1	13.7	0	3.75	0.335	5.5	3.559	1.282	0.561	0.038	0.06	165	2.77613	128.705	50.4	25.7	1	3.48	3.35	1.32	0.24	95	5.9	3.46
75	0	48.7	73.05	0	0	0	0	0	0	0	77	1	42	95.2414	0	61	121	0	12.7	0	3.89	0.347	2.8	1.355	1.095	0.28	0.05	0.02	206	1.23744	188.128	66.4	37	0	3.99	0.9	1.88	1.16	112	5	2.78
76	0	72	108	0	0	0	0	0	0	1	47	0	74	104.416	0	68	91	1	12.9	0	3.01	0.258	11	8.943	1.694	0.341	0	0.022	123	5.27922	72.6092	63.3	40.2	0	2.87	0.79	1.59	0.92	228	6.3	3.27
77	0	46	69	0	0	0	0	0	0	0	81	1	66	75.4062	0	65	112	1	13.9	0	3.84	0.35	8.2	4.084	2.952	0.869	0.213	0.082	245	1.38347	82.9946	74.9	41.4	0	6.92	1.51	1.45	0.11	322	5.8	3.74
78	0	57	85.5	0	0	0	0	0	0	0	52	0	67	90.7786	0	63	136	0	13	0	4.54	0.408	5.7	3.135	1.921	0.49	0.142	0.011	182	1.63196	94.7423	73.1	43.6	0	4.3	0.82	2.85	1.06	333	6.2	3.73
79	0	62	93	0	1	0	0	0	0	0	60	0	59	95.9682	0	57	119	1	13.2	0	4.28	0.38	5.1	2.412	2.142	0.423	0.092	0.031	275	1.12605	128.385	77.8	44.4	0	7.1	2.97	4.27	1.31	407	5.4	3.65
80	0	90	135	0	1	0	0	0	0	1	43	0	98	81.0185	0	91	144	0	14	0	5.05	0.44	8.7	6.325	1.575	0.478	0.27	0.052	212	4.01587	134.603	68.6	36.4	0	5.33	1.22	3.85	0.84	482	5.7	3.79
81	0	92.5	138.75	1	1	0	0	0	1	1	39	0	44	136.762	0	82	149	0	12.9	0	3.85	0.366	14.6	11.505	2.015	0.949	0.117	0.015	228	5.70968	113.151	67.4	40	0	25.24	9.48	/	/	638	8.7	4.06
82	0	58	87	1	1	0	0	0	0	0	81	1	67	74.0477	0	63	124	0	13.9	0	4.18	0.372	16.6	14.708	0.78	1.062	0.017	0.033	213	18.8564	273.077	81	36.8	0	5.71	0.81	3.39	1.4	254	10.2	3.94
83	0	52	78	0	0	0	0	0	0	0	67	1	52	95.2395	0	39	109	1	13.3	0	3.6	0.317	4.9	2.754	1.896	0.098	0	0.152	81	1.45253	42.7215	57.5	25.5	1	3.55	1.89	1.98	0.47	113	6.5	3.25
84	0	71.5	107.25	0	0	0	0	0	0	0	38	0	59	112.007	0	48	137	0	13.7	0	4.86	0.414	18.1	15.946	1.213	0.833	0.072	0.036	281	13.1459	231.657	69	31.7	1	5.3	2.16	3.41	0.67	234	13.1	3.21
85	0	45	67.5	0	0	0	0	0	0	0	48	0	60	103.833	0	62	94	1	15.3	1	3.69	0.311	5.5	3.866	1.282	0.281	0.06	0.011	219	3.0156	170.827	76.1	40.9	0	3.45	1.85	1.74	0.74	285	4.3	3.61
86	0	46	69	0	0	0	0	0	0	0	44	0	57	108.609	0	81	103	1	12.7	0	3.5	0.313	5.5	3.982	0.605	0.396	0.495	0.022	189	6.58182	312.397	64.7	35.4	0	3.68	1.03	2.16	0.9	325	5.3	4.26
87	0	68	102	0	0	0	0	0	0	1	69	1	64	94.9648	0	51	124	0	14.2	0	3.94	0.373	3.7	2.509	0.758	0.34	0.081	0.011	152	3.31003	200.528	61.1	40.9	0	3.88	1.6	2.09	0.91	229	6.6	3.33
88	0	49	73.5	0	0	0	0	0	0	1	43	0	86	94.8786	0	78	124	0	12.3	0	4.31	0.371	4.5	1.327	2.349	0.486	0.306	0.032	264	0.564921	112.388	60.1	36.7	0	4.09	0.65	2.03	1.36	451	4.8	3.8
89	0	48	72	0	0	0	0	0	0	1	18	0	94	101.563	0	61	142	0	12.5	0	4.6	0.421	11.4	10.317	0.684	0.376	0	0.023	163	15.0833	238.304	74.6	50.8	0	4.33	0.75	2.28	1.13	561	6.6	4
90	0	67	100.5	1	0	0	0	0	1	1	59	0	73	96.5127	0	66	73	1	13	0	2.52	0.224	9.3	7.979	1.051	0.223	0.028	0.019	238	7.59182	226.451	48.7	33.2	1	3.66	1.87	2.18	0.6	337	13.3	4.71
91	0	43	64.5	0	0	0	0	0	0	0	47	0	72	86.1879	0	53	131	0	12.1	0	4.44	0.41	10.1	7.1	1.99	0.879	0.111	0.02	256	3.56784	128.643	70.9	45.2	0	3.43	0.69	1.56	1.62	275	4	4.16
92	0	51	76.5	0	0	0	0	0	0	0	42	0	39	124.793	0	55	86	1	13.6	0	2.77	0.252	14.4	12.701	1.138	0.547	0	0.014	188	11.1608	165.202	52.8	29.4	1	3.43	1.12	2.04	0.82	91	5.9	3.7
93	0	51	76.5	0	1	0	1	0	0	0	68	1	66	82.6166	0	53	124	0	13	0	4.15	0.364	15.5	14.198	0.837	0.45	0	0.015	229	16.963	273.596	73.1	42.2	0	5.8	1.08	3.59	1.41	240	10.6	3.05
94	0	75	112.5	0	0	0	0	0	0	1	65	0	87	80.1644	0	75	147	0	15.7	1	5.14	0.436	14.6	10.6	2.394	1.387	0.146	0.073	221	4.42774	92.3141	74.2	37.9	0	5.1	1.04	3.31	1.02	185	5.2	3.86
95	0	60	90	0	0	0	0	1	0	0	58	0	110	47.7925	1	111	118	1	14.1	0	3.75	0.377	10.3	7.313	2.111	0.628	0.196	0.051	226	3.46423	107.058	65	38.6	0	13.63	9.37	7.07	0.57	425	3.7	3.72
96	0	80	120	0	0	0	0	1	0	1	72	1	108	58.7619	1	111	133	0	13	0	4.37	0.384	5.7	3.01	1.898	0.467	0.296	0.029	162	1.58588	85.353	64.8	37.1	0	4.16	0.95	2.62	0.95	488	4.4	3.36
97	0	60	90	1	1	0	0	1	0	1	68	1	95	70.5733	0	79	124	0	12.6	0	4.14	0.388	12.7	9.03	2.375	1.156	0.114	0.025	377	3.80211	158.737	62.2	34.5	1	4.92	1.41	2.86	1.1	359	6.1	3.25
98	0	70	105	0	0	0	0	1	0	0	83	1	41	92.0374	0	36	111	1	13.3	0	3.65	0.355	9.7	6.441	2.066	0.854	0.31	0.029	180	3.11762	87.1249	67.9	38.1	0	2.6	1.09	1.28	0.6	111	5.8	4.1
99	0	60	90	0	1	1	0	1	0	0	61	0	88	61.2874	0	61	126	0	12.9	0	4.36	0.398	10.6	7.293	2.109	0.996	0.159	0.042	193	3.45804	91.5126	71.1	39.7	0	2.8	1.2	1.36	1	356	4.9	2.84
100	0	72.5	108.75	0	1	0	0	1	1	1	68	1	137	45.3328	1	149	134	0	13	0	4.13	0.391	9.1	6.379	1.62	0.956	0.137	0.009	139	3.93765	85.8025	62.2	39.1	0	3.81	1.56	2.35	0.79	484	5.7	3.58
101	0	55	82.5	0	0	0	0	0	1	1	65	0	83	84.8584	0	91	142	0	12.9	0	4.93	0.444	4.5	2.372	1.526	0.464	0.131	0.009	173	1.55439	113.368	73.5	43.7	0	4.73	0.81	2.94	1.17	366	4.4	3.53
102	0	80	120	0	0	0	0	0	1	1	45	0	63	113.134	0	89	121	0	13.1	0	4.31	0.37	14.1	9.518	2.919	1.438	0.169	0.056	339	3.26071	116.136	71.4	40.6	0	3.41	1.64	1.87	0.6	113	6.6	4.01
103	0	48	72	1	0	0	0	1	0	1	61	0	68	97.9823	0	85	139	0	12.5	0	4.42	0.423	7.2	4.313	1.757	0.706	0.396	0.029	152	2.45475	86.5111	66.4	37.5	0	5.16	0.92	3.36	0.95	241	9.3	3.39
104	0	61.3	91.95	1	1	0	0	1	0	0	74	1	64	82.209	0	45	163	0	12.7	0	5.32	0.479	10.4	7.353	2.35	0.634	0.042	0.021	192	3.12894	81.7021	63.4	37.6	0	5.43	1.18	3.03	1.42	316	7	3.27
105	0	68	102	1	1	1	1	1	1	1	68	1	111	58.4672	1	105	121	0	13.5	0	3.75	0.366	6.7	3.973	1.796	0.724	0.188	0.02	167	2.21214	92.9844	74.9	40	0	4.1	3.07	1.49	0.7	600	5.3	4.01
106	0	58	87	0	1	0	0	1	0	0	61	0	53	98.7188	0	57	122	0	13.1	0	4.53	0.377	8	5.28	1.952	0.584	0.152	0.032	269	2.70492	137.807	75.4	39.9	0	7.79	1.89	5.31	1.01	275	5.4	3.98
107	0	62.5	93.75	0	0	0	0	1	0	1	61	0	79	92.1264	0	86	132	0	12.8	0	4.36	0.4	5.7	3.836	0.946	0.667	0.239	0.011	171	4.05497	180.761	66.1	35.8	0	4.36	1.64	2.61	0.85	359	4.5	3.49
108	0	80	120	0	1	0	0	1	1	1	52	0	81	95.755	0	86	141	0	12.5	0	4.64	0.408	5.8	1.85	2.877	0.766	0.249	0.058	229	0.643031	79.5968	67.8	40.2	0	6.47	4.34	3.86	0.87	455	15.8	3.39
109	0	58	87	0	0	0	0	1	0	0	69	1	79	66.0106	0	91	131	0	12.8	0	4.47	0.39	7.3	3.964	2.219	0.876	0.19	0.051	205	1.78639	92.384	74.2	43.1	0	7.47	2.74	4.82	1.31	520	5.4	3.96
110	0	42	63	0	0	0	0	0	0	0	43	0	63	104.175	0	56	112	1	12.8	0	4.26	0.347	7.3	4.833	1.701	0.708	0.051	0.007	210	2.84127	123.457	72.7	44.7	0	4.01	0.81	2.04	1.03	225	4.5	2.94
111	0	64.8	97.2	0	1	0	0	1	1	1	80	1	86	73.1628	0	72	165	0	13.4	0	5.29	0.475	10.3	7.241	1.576	1.154	0.278	0.051	229	4.59454	145.305	77.4	36.1	0	4.14	1.7	2.29	0.68	375	5.4	2.88
112	0	55	82.5	1	0	0	0	0	0	1	51	0	101	73.8493	0	96	125	0	13.6	0	4.86	0.4	5.5	3.542	1.199	0.572	0.16	0.028	242	2.95413	201.835	70.8	42	0	5.61	0.75	3.19	1.8	255	5.4	3.35
113	0	60	90	0	0	0	0	0	0	0	40	0	75	86.1723	0	75	103	1	13.1	0	3.88	0.327	8.1	6.3	1.2	0.6	0.1	0	181	5.25	150.833	67.8	33.4	1	2.8	0.27	1.56	1.03	222	7.6	2.99
114	0	45	67.5	0	1	0	1	1	0	0	51	0	86	67.6005	0	89	116	1	12.8	0	3.93	0.353	6	3.906	1.512	0.462	0.108	0.012	146	2.58333	96.5608	64.9	38.4	0	3.7	1.57	2.02	1.14	221	4.4	3.83
115	0	60	90	0	1	0	0	1	1	1	59	0	101	69.8136	0	83	118	1	13.8	0	4.43	0.378	8.6	5.667	1.901	0.929	0.077	0.026	405	2.98106	213.046	72.2	38.8	0	4.55	1.1	2.52	1.36	570	4.5	3.29
116	0	65	97.5	1	1	0	0	1	1	1	68	1	99	67.1406	0	130	80	1	18.8	1	3.8	0.257	10.5	7.7	1.7	1	0.1	0	251	4.52941	147.647	67.2	38.8	0	5.24	2.42	2.88	0.81	303	6.3	3.62
117	0	59	88.5	0	0	0	0	0	0	1	36	0	188	38.7146	1	171	116	1	14	0	5.31	0.358	8	5.9	0.8	1	0.2	0	230	7.375	287.5	68.9	41.2	0	4.17	1.03	2.29	1.33	576	4.7	3.41
118	0	66	99	0	0	0	0	0	0	1	66	1	95	71.5718	0	77	115	1	14.4	0	3.91	0.347	4.9	2.837	1.338	0.554	0.152	0.02	182	2.12033	136.024	65.4	36.6	0	4.49	0.56	2.62	1.34	336	5	3.78
119	0	62	93	0	1	1	1	0	0	1	70	1	136	45.0981	1	117	133	0	13.7	0	4.43	0.392	5.7	2.867	2.092	0.593	0.108	0.04	179	1.37046	85.5641	67.5	39.7	0	3.34	1	2.11	0.86	302	4	3.34
120	0	65	97.5	0	0	0	0	0	0	1	48	0	100	76.3349	0	98	156	0	13.1	0	5.09	0.479	7.4	4.151	2.287	0.688	0.237	0.037	265	1.81504	115.872	88	42.1	0	6.16	0.76	3.92	1.06	510	4.9	3.17
121	0	66	99	1	0	0	0	0	0	1	51	0	85	90.9711	0	79	141	0	12.3	0	4.58	0.411	9.1	4.241	3.604	0.928	0.228	0.1	219	1.17675	60.7658	69	42.9	0	4.8	4.75	2.26	0.67	387	11	3.82
122	0	72	108	0	1	0	0	0	0	0	61	0	92	58.0807	1	95	124	0	13.2	0	4.41	0.398	8	4.304	3.08	0.384	0.192	0.04	288	1.3974	93.5065	82.7	43.5	0	6.34	3.47	3.89	1.08	496	5.5	4.16
123	0	43	64.5	0	0	0	0	0	0	1	67	1	127	50.0334	1	80	128	0	13.9	0	3.88	0.367	6.4	3.648	1.971	0.621	0.128	0.032	258	1.85084	130.898	69.9	43	0	5.04	0.81	3.36	0.89	310	4.2	1.01
124	0	60	90	0	1	0	0	0	0	1	38	0	71	113.138	0	57	147	0	13.2	0	5.21	0.455	14.2	12.808	1.108	0.227	0	0.057	269	11.5596	242.78	83.5	51.5	0	5.76	1.16	3.6	1.04	462	7.6	3.5
125	0	31	46.5	0	0	1	1	0	0	0	83	1	140	29.9547	1	113	86	1	13.3	0	2.68	0.262	6.8	4.957	1.306	0.469	0.061	0.007	171	3.79556	130.934	73.6	39.9	0	4.9	1.43	2.72	1.19	502	6	4.57
126	0	55	82.5	0	0	0	0	0	0	1	78	1	70	85.9233	0	93	121	0	14.3	0	5.46	0.376	9.2	6.992	1.233	0.957	0.009	0.009	172	5.67072	139.497	67.6	35.7	0	3.89	0.82	2.5	0.71	113	5.4	3.1
127	0	45	67.5	0	0	0	0	0	0	0	46	0	45	115.755	0	60	123	0	13	0	3.9	0.384	5.8	3.695	1.032	0.76	0.273	0.041	239	3.58043	231.589	60.8	37.1	0	4.1	1.01	1.92	0.79	109	7.5	3.54
128	0	50	75	0	0	0	0	0	1	1	79	1	125	46.8798	1	137	94	1	14.4	0	2.8	0.291	4.6	3.836	0.644	0.11	0	0.009	425	5.95652	659.938	76.8	34.5	1	3.95	0.6	2.35	0.98	421	6	4.49
129	0	48	72	1	0	0	0	0	0	0	79	1	83	57.9658	1	63	140	0	13.7	0	4.8	0.414	8.6	6.631	1.496	0.421	0.009	0.043	194	4.43249	129.679	73.7	42.9	0	5.11	1.54	3.14	0.95	360	15.3	3.22
130	0	58.3	87.45	0	0	0	0	0	0	1	83	1	126	45.1439	1	142	93	1	14.5	0	3.22	0.277	9.6	7.69	1.094	0.691	0.115	0.01	170	7.02925	155.393	54.5	30.5	1	4.46	1.21	2.83	0.64	372	5.9	2.97
131	0	59.7	89.55	0	0	0	0	0	0	1	79	1	95	65.3254	0	68	113	1	16.1	1	3.39	0.331	9.4	8.159	0.667	0.555	0.009	0.009	122	12.2324	182.909	67.5	35.2	0	4.33	0.8	3.04	0.67	210	7.1	4
132	0	65.6	98.4	0	0	0	0	0	0	0	66	1	152	30.5596	1	188	115	1	13.3	0	3.86	0.345	7.8	7.02	0.757	0.008	0.008	0.008	221	9.27345	291.942	67.6	37.9	0	5.11	1.23	3.08	0.99	426	13.2	4.47
133	0	47	70.5	1	0	0	0	0	0	0	83	1	65	75.7395	0	95	90	1	14.3	0	3.47	0.263	8.5	6.537	1.351	0.535	0.043	0.034	389	4.83864	287.935	71.1	29.3	1	4.86	1.41	2.46	0.32	230	4.9	3.26
134	0	70	105	1	1	1	1	0	0	0	56	0	167	29.2577	1	122	123	0	14	0	4.62	0.368	14	13.37	0.574	0.042	0	0.014	223	23.2927	388.502	74.2	40	0	3.99	1.73	2.37	0.51	808	7.3	3.5
135	0	46	69	0	0	0	0	0	0	0	38	0	70	94.9937	0	71	121	0	12.5	0	4.3	0.383	5.6	2.643	2.369	0.487	0.062	0.039	137	1.11566	57.8303	82.2	45.6	0	5.01	0.65	2.11	1.79	303	6.1	3.9
136	0	55	82.5	0	0	0	0	0	0	1	65	0	75	91.5073	0	71	154	0	12.9	0	4.8	0.435	6.1	3.178	2.147	0.567	0.159	0.049	249	1.4802	115.976	75.6	44.8	0	4.01	2.37	1.98	1.16	377	5.4	4.24
137	0	53	79.5	0	0	0	0	0	0	1	49	0	76	101.836	0	78	154	0	12	0	5.12	0.454	5.7	3.004	2.234	0.319	0.12	0.023	200	1.34467	89.5255	70.9	43.1	0	4.27	0.92	2.64	1.04	228	5.8	4.08
138	0	53	79.5	0	0	0	0	0	0	0	62	0	44	104.217	0	76	130	0	13	0	4.49	0.401	7.4	3.885	2.842	0.54	0.111	0.022	250	1.367	87.9662	75.4	43.7	0	8.44	2.19	5.51	1.26	378	8.8	4.16
139	0	40	60	0	0	0	0	0	0	0	65	0	45	101.292	0	46	111	1	13.4	0	3.74	0.335	7.2	5.17	1.094	0.67	0.259	0.007	356	4.72578	325.411	74.3	43.4	0	4.75	1.11	2.54	1.18	221	6	3.27
140	0	57	85.5	0	0	0	0	0	1	1	65	0	65	97.0506	0	56	145	0	13.4	0	4.7	0.441	7.7	4.143	1.987	0.995	0.562	0.054	231	2.08505	116.256	63.6	38.6	0	4.38	1.68	2.53	0.63	235	4.6	3.84
141	0	58	87	0	0	0	0	0	0	0	57	0	81	69.678	0	69	125	0	12.4	0	3.94	0.376	14.29	10.968	2.145	1.044	0.071	0.071	302	5.11329	140.793	80.4	39.5	0	3.91	0.9	2.01	1.01	212	5.5	3.53
142	0	66	99	0	0	0	0	0	0	0	65	0	72	75.9509	0	73	135	0	13.5	0	4.7	0.415	6.6	3.841	2.171	0.449	0.099	0.04	208	1.76923	95.8084	89.7	45.3	0	5.79	1.51	3.83	1.03	361	5.1	3.65
143	0	60	90	0	0	0	0	0	0	0	53	0	58	101.374	0	66	142	0	14.6	0	4.71	0.428	6.3	3.679	1.852	0.435	0.283	0.05	188	1.9865	101.512	71	44.9	0	4.75	0.88	2.57	1.6	321	5.8	3.88
144	0	61	91.5	0	0	0	0	0	0	1	50	0	87	89.0723	0	80	142	0	12.6	0	4.55	0.435	5	2.79	1.47	0.325	0.375	0.04	234	1.89796	159.184	83	50	0	4.1	1.22	2.36	0.89	264	5.2	4.24
145	0	52	78	0	0	0	0	0	0	0	54	0	64	94.6095	0	58	117	1	14.1	0	4.11	0.352	6.2	2.858	2.635	0.558	0.062	0.087	267	1.08463	101.328	72.9	38.1	0	5.81	1.19	4.2	0.75	252	4.8	4.35
146	0	62	93	0	1	0	0	1	0	1	61	0	116	58.2282	1	122	141	0	13.4	0	4.36	0.423	3.1	1.252	1.023	0.471	0.319	0.034	122	1.22385	119.257	70.2	39.1	0	4.89	1.25	3.22	0.81	387	4.7	3.86
147	0	53	79.5	0	0	0	0	0	1	1	65	0	81	87.3981	0	90	118	1	16.4	1	4.68	0.351	5.5	3.042	1.54	0.808	0.088	0.022	226	1.97532	146.753	60.7	35.7	0	3.85	2.42	1.76	0.12	247	5.9	3.85
148	0	60	90	0	0	0	0	0	0	1	57	0	97	74.3463	0	103	129	0	13.1	0	4.39	0.396	6.9	3.816	1.932	0.58	0.49	0.083	187	1.97516	96.7909	65.1	43	0	4.89	1.15	2.8	1.38	469	5.9	4.02
149	0	83	124.5	0	0	0	0	0	1	1	35	0	70	116.223	0	64	145	0	13	0	4.98	0.417	4.3	2.223	1.466	0.55	0.03	0.03	69	1.51637	47.0668	59.4	34	1	2.98	3.11	0.34	0.15	175	19.7	3.84
150	0	73	109.5	0	0	0	0	1	0	1	65	0	113	58.4371	1	99	141	0	13.1	0	4.69	0.42	8.5	5.364	2.499	0.501	0.119	0.017	227	2.14646	90.8363	74	43.1	0	4.9	1.01	2.97	1.17	350	6.1	3.72
151	0	56	84	1	0	0	0	0	0	0	65	0	79	67.8917	0	73	131	0	13	0	4.58	0.408	7.2	3.074	3.24	0.662	0.173	0.05	249	0.948765	76.8519	73	43.9	0	6.21	3.47	3.96	0.6	296	5.6	3.96
152	0	65	97.5	0	0	0	0	0	0	1	52	0	109	66.8762	0	97	146	0	12.7	0	5.01	0.431	5.2	2.345	2.179	0.374	0.281	0.021	203	1.07618	93.162	74.3	47.5	0	5.96	1.42	3.83	1.24	422	5.3	4.47
153	0	64	96	0	0	0	0	0	0	0	49	0	63	99.8751	0	65	128	0	12.9	0	4.48	0.412	5.4	3.451	1.577	0.292	0.049	0.032	216	2.18833	136.969	72.3	43.4	0	5.91	0.74	3.66	1.18	257	5.5	3.91
154	0	57.9	86.85	0	0	0	0	0	1	1	65	0	77	90.5228	0	50	114	1	13.3	0	3.63	0.37	5.2	2.479	1.92	0.702	0.078	0.021	105	1.29115	54.6875	72.4	41.5	0	7.49	2.03	4.05	1.91	316	8.4	4.65
155	0	50	75	0	0	0	0	1	0	1	61	0	61	102.456	0	81	130	0	13.4	0	4.3	0.387	6.7	3.209	2.425	0.663	0.301	0.101	215	1.3233	88.6598	65.3	37.2	0	4.14	0.78	2.45	1.11	325	4.4	3.4
156	0	56	84	0	1	1	0	1	1	1	68	1	89	76.3652	0	96	145	0	13	0	5.04	0.427	8.5	5.313	2.219	0.68	0.238	0.051	286	2.39432	128.887	76.7	46.8	0	4.25	2.6	2.3	0.93	415	5.8	3.15
157	0	82	123	1	1	0	0	0	1	1	49	0	79	100.229	0	76	137	0	12.5	0	5.13	0.462	10.2	8.711	0.887	0.337	0.245	0.02	194	9.82074	218.715	78.3	48.3	0	6.72	2.14	4.04	1.62	449	10.8	3.99
158	0	55	82.5	0	1	1	1	1	0	0	87	1	82	55.6071	1	88	132	0	14	0	4.21	0.412	11	7.273	3.177	0.506	0.022	0.022	180	2.28927	56.6572	62.4	33.4	1	3.86	1.11	2	1.17	324	5.5	3.04
159	0	62	93	0	0	0	0	0	1	1	59	0	70	98.1918	0	74	132	0	12.8	0	4.34	0.391	6.5	3.018	2.689	0.637	0.143	0.013	165	1.12235	61.3611	73.4	39.3	0	3.55	0.48	1.77	1.08	268	6.2	3.87
160	0	54	81	0	1	0	0	0	1	1	45	0	66	110.991	0	85	134	0	13.8	0	4.36	0.389	11.8	9.192	1.18	1.381	0.035	0.012	182	7.78983	154.237	62.5	35.4	0	3.39	0.81	1.63	1.08	365	5.2	3.64
161	0	63	94.5	0	0	0	0	0	0	0	42	0	61	107.715	0	69	170	0	12.8	0	5.45	0.482	9.8	7.154	1.97	0.627	0.029	0.02	223	3.63147	113.198	71.5	42.2	0	5.17	4.13	2.8	1.02	308	11.4	3.08
162	0	39	58.5	0	0	0	0	0	1	1	60	0	106	65.3912	0	87	92	1	13.9	0	2.94	0.263	6.2	3.768	1.707	0.502	0.211	0.012	185	2.20738	108.377	60.1	25.9	1	3.33	2.66	1.4	0.69	187	5	3.49
163	0	59	88.5	0	0	0	0	0	1	1	53	0	105	69.4787	0	109	129	0	12.7	0	7.5	0.376	7.5	5.34	1.2	0.765	0.172	0.022	242	4.45	201.667	68.9	42.9	0	3.15	1.43	1.67	0.87	356	5.5	3.7
164	0	42	63	0	0	0	0	0	0	1	25	0	53	139.784	0	70	139	0	12.4	0	4.33	0.399	5.5	3.054	2.308	0.127	0	0.011	187	1.32322	81.0225	69.9	36.8	0	5.21	1.42	3.23	0.81	168	8.3	3.71
165	0	68.2	102.3	1	1	0	0	1	1	1	59	0	75	95.4465	0	82	147	0	13.3	0	4.74	0.443	10.4	5.772	3.297	0.998	0.026	0.073	186	1.75068	56.4149	71.3	39.1	0	5.11	3.45	2.77	0.83	350	10.6	3.19
166	0	60	90	0	1	0	0	1	1	1	61	0	97	72.2863	0	105	138	0	13.5	0	4.4	0.409	5.8	3.492	1.612	0.493	0.151	0.052	256	2.16625	158.809	61.1	35.8	0	4.46	0.95	2.38	1.44	419	4.6	3.83
167	0	45	67.5	0	1	0	0	1	0	0	81	1	67	74.0477	0	57	152	0	12.4	0	5.17	0.45	9.9	5.306	3.396	1	0.178	0.02	152	1.56243	44.7585	69.7	38.8	0	4.38	2.77	2.62	0.88	341	4.8	2.98
168	0	72	108	0	0	0	0	0	0	1	36	0	106	77.3993	0	83	162	0	13	0	5.3	0.505	6.7	2.325	3.464	0.824	0.047	0.04	171	0.671189	49.3649	82.1	46.7	0	4.9	1.17	3.17	0.9	365	4.7	3.72
169	0	50	75	1	1	0	0	1	0	0	83	1	75	63.7067	0	77	110	1	13.6	0	3.92	0.344	6.3	3.969	1.31	0.769	0.17	0.082	138	3.02977	105.344	75.5	38.2	0	3.9	1.27	2.32	0.92	312	5.8	3.31
170	0	82	123	0	1	0	0	1	1	1	33	0	72	116.511	0	82	154	0	13.4	0	4.77	0.457	8.4	5.107	2.36	0.748	0.143	0.042	240	2.16398	101.695	71.6	40.3	0	5.34	2.45	3.42	0.81	431	4.3	2.81
171	0	59	88.5	1	1	0	0	1	0	1	59	0	56	107.623	0	77	108	1	13.5	0	3.91	0.344	6.5	4.179	1.56	0.643	0.098	0.02	218	2.67885	139.744	64.5	33.3	1	3.29	1.23	1.92	0.52	277	9.3	2.85
172	0	63	94.5	0	0	0	0	0	0	1	29	0	85	106.174	0	85	138	0	12.9	0	4.66	0.396	6.6	3.505	2.317	0.647	0.092	0.04	223	1.51273	96.2451	68.8	43.7	0	4.72	2.42	2.54	0.67	394	4.8	3.13
173	0	35	52.5	0	0	0	0	0	0	0	66	1	85	61.7063	0	73	153	0	13.5	0	5.17	0.459	9.3	5.635	2.735	0.781	0.102	0.046	295	2.06033	107.861	46.2	23.1	1	6.18	1.77	3.05	1.77	359	5.3	3.35
174	0	63	94.5	0	0	0	0	0	0	1	29	0	72	119.831	0	95	136	0	13	0	4.44	0.407	5.5	2.602	2.349	0.341	0.16	0.05	278	1.10771	118.348	79.2	45.6	0	4.1	2.15	2.13	0.59	412	5.1	3.98
175	0	80	120	0	0	0	0	0	0	1	76	1	89	72.1921	0	88	117	1	14.4	0	3.82	0.35	4.5	2.462	1.363	0.405	0.252	0.018	258	1.80631	189.288	87.2	30.6	1	3.87	0.96	2.32	0.98	476	5.3	4.12
176	0	60	90	0	0	0	0	0	1	1	65	0	77	90.5228	0	50	131	0	13.1	0	4.2	0.432	8	5.408	2.232	0.352	0	0.08	141	2.42294	63.172	72.4	41.5	0	7.49	2.03	4.05	1.91	316	8.4	4.65
177	0	53	79.5	0	0	0	0	0	0	0	76	1	62	84.3779	0	68	128	0	12.8	0	4.01	0.396	6.1	2.074	3.184	0.793	0.018	0.03	182	0.651382	57.1608	80.5	39.1	0	4.11	1.66	2.01	0.86	331	6.8	3.37
178	0	64	96	0	0	0	0	0	0	0	49	0	63	99.8751	0	65	128	0	12.9	0	4.48	0.412	5.4	3.451	1.577	0.292	0.049	0.032	216	2.18833	136.969	72.3	43.4	0	5.91	0.74	3.66	1.18	257	5.5	3.91
179	0	75	112.5	0	1	0	0	0	0	1	70	1	86	78.487	0	80	120	0	12.6	0	4.09	0.387	4.9	3.1	1.1	0.5	0.1	0	207	2.81818	188.182	69.3	44.7	0	6.88	1.57	4.04	1.67	291	6.2	3.82
180	0	65	97.5	0	0	0	0	0	0	1	52	0	109	66.8762	0	97	146	0	12.7	0	5.01	0.431	5.2	2.345	2.179	0.374	0.281	0.021	203	1.07618	93.162	74.3	47.5	0	5.96	1.42	3.83	1.24	422	5.3	4.47
181	0	56	84	1	0	0	0	0	0	0	65	0	79	67.8917	0	73	131	0	13	0	4.58	0.408	7.2	3.074	3.24	0.662	0.173	0.05	249	0.948765	76.8519	73	43.9	0	6.21	3.47	3.96	0.6	296	5.6	3.96
182	0	47	70.5	0	0	0	0	0	0	0	23	0	45	136.053	0	60	90	1	12.5	0	2.89	0.267	15	10.135	3.41	1.335	0.075	0.045	178	2.97214	52.1994	70.7	42.4	0	4.3	1.09	2.18	1.37	348	6.4	3.5
183	0	55	82.5	0	0	0	0	0	1	1	60	0	78	93.2629	0	72	144	0	13	0	4.21	0.421	5	3.33	1.36	0.22	0.06	0.03	181	2.44853	133.088	67.1	41.5	0	5.15	0.97	3.07	0.93	404	5.2	3.85
184	0	77	115.5	0	1	0	0	0	1	1	53	0	126	55.7341	1	114	143	0	14.4	0	4.61	0.425	8.6	5.072	2.591	0.808	0.086	0.043	193	1.95755	74.4886	78.2	37.9	0	5.16	1.63	3.26	0.84	358	4.7	3.83
185	0	70	105	0	0	0	0	0	0	1	72	1	92	71.3322	0	89	139	0	13.3	0	4.81	0.422	8.1	4.719	2.393	0.81	0.138	0.041	237	1.972	99.0389	57.9	28.9	1	4.21	1.16	2.63	0.72	261	6.3	3.56
186	0	73	109.5	1	0	1	0	1	0	1	57	0	75	96.7969	0	63	134	0	13.4	0	4.68	0.4	6.6	3.709	2.178	0.581	0.079	0.053	247	1.70294	113.407	66	37.6	0	5.27	1.96	3.5	0.65	409	6.7	3.37
187	0	54	81	1	1	1	0	1	0	0	60	0	47	103.423	0	65	126	0	13.5	0	4.34	0.396	7.5	4.6	1.9	0.7	0.2	0.1	348	2.42105	183.158	74.8	39.7	0	6.27	1.28	3.48	1.04	308	5.2	3.11
188	0	47	70.5	0	1	1	0	0	0	0	84	1	91	50.0729	1	91	106	1	13.4	0	3.73	0.33	7	4.082	2.029	0.721	0.119	0.049	216	2.01183	106.456	63.5	35.5	0	4.09	0.99	2.02	1.38	360	5.1	3.38
189	0	65	97.5	0	0	0	0	0	0	1	21	0	117	76.3232	0	106	145	0	12.8	0	4.58	0.416	8	4.456	2.472	1	0.048	0.024	157	1.80259	63.5113	67.5	41.7	0	2.91	0.72	1.33	1.07	562	7.1	3.43
190	0	57.3	85.95	0	1	0	0	1	0	0	67	1	62	89.8846	0	58	134	0	13	0	4.41	0.419	6.5	3.7	2	0.7	0.1	0	218	1.85	109	68.7	36.3	0	3.9	0.88	2.41	1.05	350	5.6	3.17
191	0	51	76.5	0	0	0	0	0	0	0	52	0	74	80.502	0	70	125	0	12.1	0	4.02	0.351	8	4.536	2.392	1.04	0.024	0.008	193	1.89632	80.6856	67.6	37.9	0	3.09	0.62	1.71	0.74	156	7.1	2.84
192	0	54.1	81.15	0	0	0	0	0	0	0	80	1	153	27.4786	1	139	102	1	13	0	3.25	0.312	9.2	5.799	2.279	0.782	0.285	0.055	391	2.54454	171.566	73.1	28.1	1	3.96	1.11	2.28	0.76	436	4	3.59
193	0	44	66	1	1	0	0	1	0	0	58	0	61	96.2643	0	68	137	0	14.2	0	5.06	0.411	9.7	5.219	3.56	0.563	0.281	0.078	293	1.46601	82.3034	77	36.4	0	6.9	4.48	3.98	0.89	583	11.8	3.02
194	0	41	61.5	0	0	1	0	1	0	0	72	1	84	60.0121	0	102	111	1	13.9	0	3.71	0.339	5	3.3	1.11	0.42	0.15	0.02	193	2.97297	173.874	74.6	40	0	4.07	0.95	1.82	1.77	312	5.1	3.71
195	0	65	97.5	1	1	0	0	1	1	1	72	1	95	68.6179	0	91	152	0	13.2	0	4.79	0.454	3.7	1.084	2.239	0.259	0.089	0.03	122	0.484145	54.4886	71.2	38.4	0	4.92	1.55	3.29	0.59	448	6	2.91
196	0	75	112.5	0	0	0	0	0	1	1	53	0	72	101.24	0	84	164	0	13.6	0	5.74	0.483	10.9	5.744	2.66	0.567	1.82	0.109	181	2.1594	68.0451	69.9	39.8	0	4.99	1.43	2.92	0.96	330	4.5	2.83
197	0	61	91.5	0	1	0	0	1	1	1	60	0	67	99.2757	0	82	128	0	12.8	0	4.58	0.401	7.8	4.618	2.231	0.749	0.172	0.031	228	2.06992	102.196	66.6	38.3	0	4.53	1	2.8	0.68	367	5	3.15
198	0	52	78	0	0	0	0	1	1	1	74	1	95	67.6606	0	91	123	0	14.1	0	4.41	0.382	8.5	4.372	2.632	0.935	0.518	0.043	270	1.66109	102.584	65.1	34.7	1	4.9	3.33	2.4	0.61	247	5.4	3.17
199	0	52	78	1	1	1	1	1	0	0	74	1	116	40.0554	1	123	140	0	12.9	0	4.7	0.414	8.5	5.049	2.329	0.756	0.323	0.043	185	2.16788	79.4332	71.8	40.8	0	5.6	3.67	3.13	0.95	443	11.5	4.11
200	0	63	94.5	0	1	0	0	0	0	1	58	0	75	96.1194	0	102	144	0	14.2	0	5.31	0.439	5.1	2.856	1.571	0.505	0.128	0.041	166	1.81795	105.665	79.6	46.1	0	4.8	0.61	3.06	1.15	394	6.2	4.1
201	0	53	79.5	0	1	0	0	0	0	0	83	1	63	78.656	0	57	108	1	12.8	0	4.01	0.347	6.6	4.95	1.003	0.587	0.053	0.007	228	4.93519	227.318	78.2	38.3	0	4.36	1.04	1.8	2.16	217	5.2	3.62
202	0	57	85.5	0	0	0	0	0	0	0	65	0	74	73.4762	0	52	114	1	12.5	0	3.81	0.325	12	8.188	3.524	0.264	0	0.024	297	2.3235	84.2792	66.7	39.8	0	3.96	1.51	2.37	0.65	173	7.6	3.02
203	0	75	112.5	0	0	0	0	0	0	1	63	0	102	67.0755	0	120	149	0	14.4	0	5.09	0.459	8.4	5.023	2.587	0.689	0.084	0.017	248	1.94163	95.8639	65.4	39.1	0	5.01	1.73	3.3	0.79	444	4.5	3.9
204	0	45	67.5	1	1	0	0	1	1	1	80	1	94	65.7033	0	104	122	0	12.5	0	4.1	0.358	7	3.934	1.883	0.721	0.42	0.042	213	2.08922	113.117	68.8	40	0	4.54	0.84	2.38	1.67	172	3.1	2.94
205	0	70	105	1	1	1	0	0	0	1	88	1	175	29.2995	1	170	113	1	14.7	0	4.87	0.369	5.8	3.405	1.775	0.476	0.128	0.017	228	1.91831	128.451	87.7	46.3	0	4.52	1.83	2.89	0.75	210	5.1	5
206	0	68	102	0	0	0	0	0	0	1	25	0	66	127.733	0	74	144	0	12.5	0	5.07	0.438	5.9	3.435	1.898	0.496	0.059	0.012	209	1.8098	110.116	75.7	44.4	0	4.22	1.43	2.31	1.18	611	3.7	3.61
207	0	43	64.5	0	0	0	0	0	1	1	67	1	191	30.5485	1	160	88	1	14.9	0	2.81	0.259	5.6	3.321	1.484	0.554	0.129	0.112	255	2.23787	171.833	61.5	32.1	1	3.3	1.24	1.67	0.74	463	6.2	3.79
208	0	42.5	63.75	0	0	0	0	0	0	0	16	0	63	125.931	0	77	135	0	12.6	0	4.78	0.405	7.9	4.558	2.03	1.153	0.071	0.087	320	2.24532	157.635	72.6	46	0	4.89	0.55	2.65	1.51	453	7.8	3.89
209	0	66.9	100.35	0	0	0	0	0	0	1	51	0	87	88.4488	0	92	142	0	13.7	0	4.75	0.423	17.9	12.75	4.22	0.859	0.036	0.036	208	3.02133	49.2891	69.8	41.9	0	5.64	1.02	3.48	1.56	592	8.8	2.14
210	0	53	79.5	0	1	0	0	0	0	0	52	0	68	89.1671	0	36	131	0	14	0	4.75	0.403	6.5	4.077	2.248	0.143	0.02	0.013	196	1.81361	87.1886	84.6	43.5	0	4.18	0.81	2.09	1.44	221	5.3	3.59
211	0	67	100.5	1	1	0	0	1	0	1	75	1	158	36.3225	1	149	129	0	13.9	0	4.45	0.377	8.2	4.945	2.321	0.64	0.221	0.074	223	2.13055	96.0793	65.6	32.4	1	6.11	7.97	1.17	1.04	300	12.1	2.64
212	0	70	105	0	1	0	0	1	0	1	44	0	127	58.8068	1	129	120	0	11.8	0	4.1	0.38	13.1	9.157	2.738	1.061	0.118	0.026	362	3.34441	132.213	78.7	40.3	0	4.2	0.65	2.45	1.21	309	2.45	1.21
213	0	60	90	0	1	0	0	1	0	0	60	0	53	99.4147	0	56	122	0	13.8	0	4.58	0.386	9.9	5.455	3.455	0.842	0.119	0.03	263	1.57887	76.1216	75.8	35.7	0	3.8	1.25	1.92	1.12	273	10	3.55
214	0	50	75	1	1	0	0	1	0	1	63	0	66	97.8081	0	46	135	0	13.8	0	4.44	0.386	7	3.592	2.4	0.658	0.322	0.028	201	1.49667	83.75	62.9	35.6	0	2.74	0.62	1.34	0.7	263	8.9	2.52
215	0	60	90	1	0	0	0	1	0	0	79	1	51	88.1014	0	66	127	0	13	0	4.15	0.378	5.5	3.267	1.76	0.357	0.088	0.028	238	1.85625	135.227	73.5	35.7	0	5.62	1.61	3.3	0.91	295	6.1	2.91
216	0	70	105	0	0	0	0	1	0	0	64	0	153	30.7473	1	135	113	1	14.4	0	3.86	0.356	12.1	7.111	3.561	1.222	0.024	0.181	116	1.99691	32.5751	68.4	26.2	1	4.44	2.57	2.13	0.32	632	8.8	2.62
217	0	55.9	83.85	0	1	0	0	1	0	0	73	1	60	87.1096	0	68	134	0	14.1	0	4.62	0.41	10.2	6.099	2.928	1.132	0.02	0.02	339	2.08299	115.779	70.7	39.3	0	4.75	0.69	2.9	1.14	432	5.2	3.06
218	0	65	97.5	0	0	0	0	1	0	1	77	1	153	37.2357	1	141	133	0	13.8	0	4.43	0.401	7.8	4.306	2.473	0.702	0.273	0.047	244	1.74121	98.6656	79.1	38.4	0	5.01	1.61	3.01	0.75	653	5.1	3.99
219	0	61	91.5	1	0	0	0	1	1	1	71	1	100	64.9465	0	119	128	0	13.2	0	4	0.38	6.3	3.345	1.896	0.58	0.428	0.05	170	1.76424	89.6624	80.5	40.3	0	4.06	0.73	2.11	1.01	226	7.3	3.58
220	0	60	90	0	1	0	0	1	1	1	72	1	77	86.1793	0	73	139	0	12.6	0	4.33	0.392	9.8	6.115	2.607	1.029	0.02	0.029	158	2.34561	60.6061	68.2	41.7	0	3.42	1.1	2.33	0.63	347	5.6	3.09
221	0	66.5	99.75	0	1	0	0	1	1	1	45	0	84	96.2546	0	70	143	0	11.7	0	4.54	0.434	9	5.94	2.07	0.873	0.099	0.018	290	2.86957	140.097	74.5	44.5	0	5.4	1.08	3.49	1.19	260	3.8	3.22
222	0	65	97.5	0	0	0	0	0	0	1	37	0	263	25.6186	1	244	124	0	13.2	0	4.33	0.381	4.4	2.144	1.481	0.572	0.172	0.031	368	1.44767	248.481	71	43	0	4.07	1.29	2.59	0.82	536	5	5.01
223	0	43	64.5	0	0	0	0	0	0	0	58	0	65	90.2799	0	46	152	0	12.8	0	5.64	0.508	17.3	14.67	1.522	1.073	0.017	0.017	320	9.63863	210.25	81.1	51.3	0	6.82	1.63	4.31	1.65	266	6.3	3.71
224	0	62.3	93.45	1	1	0	0	0	0	1	61	0	62	101.774	0	54	133	0	13.4	0	5.87	0.458	9.5	7.989	0.817	0.646	0.038	0.009	152	9.77846	186.047	70.5	45.1	0	5.06	1.21	2.76	1.19	195	11.5	3.68
225	0	56	84	0	0	0	0	0	0	0	28	0	75	93.7512	0	76	128	0	12.4	0	4.44	0.378	6.3	3.8	1.9	0.5	0.1	0	240	2	126.316	77.7	49.4	0	5.61	0.93	3.43	1.33	364	4.7	4.23
226	0	58	87	0	0	0	0	0	0	1	54	0	93	79.8956	0	114	122	0	13.9	0	3.87	0.378	7.6	4.317	2.706	0.426	0.122	0.03	256	1.59534	94.6046	61.3	35.8	0	3.93	1.12	2.37	0.92	389	4.2	3.8
227	0	54	81	0	0	0	0	0	0	0	72	1	51	92.5418	0	75	121	0	13.4	0	4.16	0.369	7.5	4.235	2.92	0.307	0.03	0.007	192	1.45034	65.7534	82.7	44.9	0	5.01	1.25	2.77	1.49	320	5.8	3.81
228	0	50	75	0	0	0	0	0	0	1	54	0	104	69.7951	0	96	123	0	13.8	0	3.97	0.365	13.4	8.948	3.447	0.978	0.013	0.013	106	2.59588	30.7514	58.9	35	0	3.3	0.71	0.97	1.16	161	5.8	3.85
229	0	77	115.5	0	1	0	0	0	0	1	61	0	83	87.2766	0	90	135	0	13.6	0	4.48	0.411	6.6	4.151	1.861	0.462	0.092	0.033	170	2.23052	91.3487	69.1	38.6	0	4.19	1.29	2.09	0.76	394	5.6	3.69
230	0	55	82.5	0	0	0	0	0	0	0	57	0	67	87.6455	0	77	127	0	13.5	0	4.09	0.393	6.1	3.312	2.043	0.543	0.128	0.073	306	1.62115	149.78	85.5	50.9	0	4.57	2.17	2.39	1.29	272	5.2	4.12
231	0	63	94.5	0	0	0	0	0	0	0	53	0	61	99.7055	0	62	142	0	12.9	0	4.5	0.421	7.8	5.015	2.293	0.437	0.047	0.008	260	2.18709	113.389	83.2	43.7	0	6.5	1.24	4.41	1.13	374	5.7	3.9
232	0	65	97.5	0	0	0	0	0	0	1	43	0	75	106.8	0	99	147	0	12.7	0	4.99	0.418	7.5	4.497	2.433	0.502	0.037	0.03	189	1.84834	77.6819	80.9	48.1	0	3.92	0.91	2.26	1.3	404	5.9	4.09
233	0	32.5	48.75	0	0	0	0	0	0	0	86	1	58	80.3989	0	75	113	1	14.6	0	3.84	0.347	8.7	5.16	2.34	0.948	0.209	0.043	261	2.20513	111.538	62.5	27.3	1	3.85	1.22	1.53	0.95	81	4.8	4.06
234	0	61	91.5	0	0	0	0	0	1	1	47	0	110	68.5062	0	100	150	0	13	0	4.83	0.45	10.8	6.413	3.372	0.886	0.108	0.022	194	1.90184	57.5326	70.1	40.1	0	4.71	0.8	3.71	0.34	430	5.2	3.85
235	0	55	82.5	1	1	0	0	1	0	0	55	0	41	112.043	0	51	121	0	13.3	0	4.29	0.396	7.4	5.321	0.947	0.836	0.289	0.007	339	5.6188	357.973	70.6	32.8	1	4.14	0.99	2.51	0.85	147	8.4	4.11
236	0	74	111	0	0	0	0	0	0	1	47	0	111	67.7608	0	113	151	0	13.9	0	4.97	0.447	4.1	2.05	1.591	0.381	0.049	0.029	157	1.2885	98.6801	82.8	42.9	0	7.31	3.03	4.41	0.75	383	7.8	3.67
237	0	34	51	0	1	0	0	0	0	0	70	1	74	70.9403	0	58	117	1	12.7	0	3.66	0.371	5.8	3.805	1.589	0.342	0.052	0.012	218	2.39459	137.193	82.1	46.3	0	4.19	0.77	2.55	0.65	109	5	4.83
238	0	76	114	0	0	0	0	0	1	1	36	0	75	112.183	0	82	140	0	12.7	0	5.17	0.419	7.3	4.125	2.343	0.584	0.197	0.051	203	1.76056	86.6411	65.2	44.8	0	4.34	3.17	2.56	0.73	479	6.5	3.66
239	0	57	85.5	0	1	0	1	0	1	1	33	0	163	46.9839	1	199	128	0	14.3	0	4	0.373	10	6.39	2.69	0.64	0.26	0.02	264	2.37546	98.1413	64.2	36.3	0	3.42	0.65	1.78	1.14	456	4.2	2.51
240	0	75	112.5	0	1	1	1	1	0	0	69	1	79	66.0106	0	72	130	0	14.8	0	4.67	0.403	12.3	7.659	3.423	1.107	0.086	0.025	254	2.23751	74.2039	81.2	41.2	0	8.97	1.55	5.81	1.78	544	4.2	3.12
241	0	65	97.5	0	1	1	1	1	1	1	55	0	65	104.113	0	78	142	0	12.2	0	4.5	0.37	10.8	6.927	2.501	1.307	0.054	0.011	182	2.76969	72.7709	71.9	44.6	0	2.71	0.95	1.37	1.11	181	5.5	2.12
242	0	60	90	0	1	0	1	0	0	0	52	0	109	50.4033	1	101	102	1	16.2	1	4.63	0.34	6.1	3.721	1.994	0.342	0.012	0.03	259	1.8661	129.89	73.9	38.4	0	5.61	0.85	3.72	1.43	413	5	3.51
243	0	38.5	57.75	0	1	0	1	0	0	0	83	1	88	52.5116	1	70	116	1	13.7	0	3.76	0.365	10.3	6.982	2.36	0.927	0.021	0.01	375	2.95847	158.898	77.9	39.4	0	8.17	0.77	4.84	2.35	349	5.5	3.96
244	0	59	88.5	0	1	1	1	1	0	1	84	1	123	46.1531	1	114	140	0	13.5	0	4.51	0.447	7.2	3.305	1.858	0.929	1.051	0.058	188	1.77879	101.184	75.6	34.9	1	4.05	0.86	2.4	1.13	535	4.6	3.27
245	0	67	100.5	1	1	0	0	1	0	0	59	0	135	37.0492	1	126	111	1	11.8	0	3.59	0.329	6.5	4.784	1.196	0.429	0.071	0.02	348	4	290.97	73.8	33.9	1	6.01	0.87	3.97	0.94	283	4.4	3.6
246	0	60	90	0	1	1	0	1	0	1	78	1	84	76.3391	0	78	111	1	13.7	0	3.41	0.344	3.9	2.57	0.87	0.261	0.187	0.008	100	2.95402	114.943	62.8	35.6	0	3.21	0.39	1.31	1.77	306	5.5	3.74
247	0	43	64.5	1	1	1	0	1	1	0	80	1	71	69.5209	0	115	119	1	15.6	1	5.82	0.379	7.9	4.779	1.564	1.074	0.458	0.024	244	3.05563	156.01	64.7	29.3	1	2.55	1.37	1.41	0.44	218	7.5	3.07
248	0	50	75	0	0	0	0	0	0	0	49	0	74	82.2165	0	93	124	0	13.2	0	4.04	0.383	8	4.56	2.576	0.56	0.272	0.032	217	1.77019	84.2391	73.9	43.9	0	5.42	1.49	2.93	1.97	497	5.3	3.73
249	0	75	112.5	0	0	0	0	0	0	1	46	0	137	52.909	1	144	143	0	12.5	0	4.63	0.435	13	8.764	2.819	1.365	0.026	0.026	238	3.1089	84.4271	66.7	41.3	0	4.77	1.04	2.86	1.32	412	5.7	3.71
250	0	56	84	0	0	0	0	0	0	0	52	0	68	89.1671	0	79	135	0	12.4	0	4.65	0.42	6.9	4.45	1.746	0.497	0.159	0.048	277	2.54868	158.648	73.5	43.6	0	5.83	0.95	3.8	0.88	357	5.3	3.8
251	0	74	111	0	1	0	1	0	0	1	67	1	128	49.5612	1	99	139	0	13.1	0	4.31	0.418	8.4	5.788	1.764	0.512	0.302	0.034	246	3.28118	139.456	71.5	44.2	0	5.55	1.01	3.2	1	359	6	3.92
252	0	50	75	1	0	0	0	0	0	0	79	1	91	51.8629	1	84	104	1	14.9	0	3.57	0.321	6.2	3.825	1.606	0.558	0.198	0.012	224	2.38169	139.477	61.7	26.7	1	4.53	2.03	3	0.56	276	8.9	4.3
253	0	53	79.5	0	0	0	0	0	0	0	82	1	130	32.9934	1	91	124	0	14.4	0	3.93	0.381	6.4	3.928	2.018	0.422	0.032	0	108	1.94648	53.5183	69.9	41	0	3.34	1.77	1.85	0.88	314	6.6	4.51
254	0	54	81	0	1	0	0	0	0	0	55	0	63	95.7531	0	70	129	0	13.5	0	4.39	0.399	6.5	4.401	1.69	0.319	0.071	0.02	227	2.60414	134.32	80.5	45.7	0	5.49	1.68	3.48	1.36	285	5.6	3.7
255	0	75	112.5	0	1	0	0	1	0	1	60	0	84	86.6284	0	104	131	0	13.6	0	4.58	0.418	7.8	3.541	3.26	0.788	0.164	0.047	206	1.0862	63.1902	71.3	38.2	0	4.24	0.54	2.63	1.35	236	3.2	2.76
256	0	62	93	0	0	0	0	0	1	1	35	0	84	103.259	0	85	154	0	12.7	0	5.33	0.477	14.3	10.755	2.659	0.858	0.014	0.014	216	4.04475	81.2335	75.3	43.3	0	4.84	1.26	3	1.09	384	5	3.12
257	0	74	111	0	0	0	0	0	1	1	45	0	82	99.1002	0	85	137	0	12.9	0	4.64	0.422	8.2	5.961	1.935	0.23	0.033	0.041	318	3.08062	164.341	72.3	35.3	0	5.98	3.51	3.68	0.79	423	5.5	3.8
258	0	65	97.5	0	0	0	0	1	1	1	60	0	104	66.9146	0	108	164	0	13.5	0	5.38	0.479	7.2	4.478	1.895	0.726	0.063	0.038	208	2.36306	109.763	72.6	44	0	5.18	2.54	2.85	1.09	473	6.7	3.69
259	0	71	106.5	1	1	0	0	1	1	1	51	0	89	86.0515	0	93	131	0	13.9	0	4.5	0.404	9.7	5.209	2.852	1.096	0.485	0.058	275	1.82644	96.4236	64.4	37.1	0	4.28	1.02	2.9	0.89	551	4.3	2.38
260	0	38	57	0	0	0	0	0	0	0	38	0	80	80.8318	0	79	121	0	12.9	0	3.98	0.373	4	2.592	1.012	0.336	0.04	0.02	144	2.56126	142.292	71.5	49.5	0	4.4	1.08	2.37	0.92	235	4.9	3.48
261	0	70	105	0	0	0	0	0	0	1	69	1	93	71.9054	0	100	95	1	16.7	1	4.2	0.319	6	2.526	1.848	0.6	0.924	0.102	156	1.36688	84.4156	62.4	39.5	0	3.33	0.62	2.28	0.95	350	5	4
262	0	71	106.5	1	1	1	0	0	0	1	50	0	80	99.0141	0	94	142	0	13	0	4.6	0.408	10.8	7.003	2.264	1.372	0.14	0.022	264	3.0932	116.608	62.3	38.1	0	2.29	0.95	0.96	0.69	330	4	3.24
263	0	50	75	0	1	1	1	1	0	0	74	1	109	43.186	1	110	103	1	15	0	3.49	0.332	8.4	5.048	2.991	0.344	0	0.017	304	1.68773	101.638	75.7	35.7	0	4.26	0.43	2.44	1.52	425	6.5	3.39
264	0	63.5	95.25	0	1	0	1	1	0	0	48	0	79	76.5032	0	70	135	0	12.4	0	4.44	0.39	8	4.328	2.608	0.76	0.272	0.032	192	1.65951	73.6196	72.3	43	0	3.07	0.83	1.92	0.68	506	4.3	3.3
265	0	75	112.5	0	1	0	1	1	0	1	42	0	98	81.5897	0	106	148	0	12.5	0	5.07	0.455	7.3	4.708	1.781	0.526	0.263	0.022	220	2.64346	123.526	73	41.9	0	2.87	1.27	1.66	0.62	453	5.3	3.26
266	0	58	87	0	1	1	1	1	0	1	77	1	103	60.0802	0	95	142	0	13.3	0	4.95	0.421	10.4	6.039	3.383	0.822	0.146	0.01	204	1.7851	60.3015	71.4	34.9	1	3.01	0.91	1.24	1.12	375	10.3	3.44
267	0	64	96	0	0	0	0	0	0	0	58	0	44	107.187	0	66	132	0	13.5	0	4.7	0.405	7.9	5.059	2.082	0.593	0.142	0.024	182	2.42988	87.4159	66.7	38.9	0	4.82	1.11	3.08	1.07	174	5.5	3.65
268	0	66.4	99.6	0	1	0	0	0	0	1	47	0	69	107.461	0	58	118	1	12.8	0	4.07	0.353	15.8	13.825	0.916	1.027	0.016	0.016	158	15.0928	172.489	74.7	45.1	0	6.18	5.15	3.23	1.6	671	9.8	3.63
269	0	61	91.5	0	0	0	0	0	0	1	62	0	100	69.1851	0	93	125	0	13.1	0	4.26	0.385	6.9	4.168	1.904	0.718	0.083	0.028	261	2.18908	137.08	69.7	39	0	4.97	1.76	3.12	0.97	345	5.7	3.62
270	0	59	88.5	0	0	0	0	0	0	0	59	0	50	102.053	0	55	102	1	14.8	0	3.68	0.308	8.6	6.072	1.505	0.92	0.086	0.017	221	4.03455	146.844	56.1	32.5	1	4.95	1.62	3	0.76	148	5.8	4.07
271	0	76	114	0	1	0	0	0	0	1	58	0	72	97.7456	0	66	131	0	13.1	0	4.31	0.395	16.9	12.571	3.366	0.592	0.304	0.068	341	3.7347	101.307	69.4	38.3	0	3.72	1.36	2.32	0.53	191	5.9	4.65
272	0	58	87	0	0	0	0	0	0	0	67	1	81	64.9513	0	63	110	1	12.5	0	3.54	0.307	6	4.028	1.438	0.432	0.09	0.012	131	2.80111	91.0987	66.5	41.4	0	5.06	0.49	2.63	1.93	251	8.1	3.63
273	0	52	78	1	0	0	0	1	0	1	83	1	76	80.2007	0	71	127	0	13.8	0	4.46	0.383	11.1	7.802	2.243	0.977	0.033	0.044	235	3.47838	104.77	73	39.2	0	3.68	0.78	2.42	1.22	144	12.3	3.13
274	0	62	93	1	1	1	0	1	0	1	70	1	114	55.8224	1	109	127	0	12.5	0	4.36	0.382	7.8	4.875	2.044	0.577	0.211	0.094	200	2.38503	97.8474	68.1	35.1	0	3.89	1.56	2.54	0.64	286	5.7	3.15
275	0	75	112.5	0	0	0	0	1	0	1	47	0	93	83.9224	0	96	151	0	13.4	0	5.45	0.454	5.8	3.434	1.775	0.435	0.139	0.017	126	1.93465	70.9859	66.5	38.2	0	4.09	2.22	2.69	0.73	330	4.9	3.18
276	0	70	105	0	1	0	1	1	0	1	66	1	106	62.6924	0	92	150	0	14.8	0	4.87	0.449	7	3.563	1.89	1.47	0.049	0.028	187	1.88519	98.9418	73.6	40.3	0	4.4	1.3	2.93	0.96	538	5	3.27
277	0	66	99	0	0	0	0	0	0	0	60	0	75	74.8777	0	82	128	0	13.7	0	4.1	0.394	5.9	3.51	1.811	0.401	0.13	0.047	205	1.93816	113.197	73.2	44.6	0	6.1	1.97	3.43	1.26	364	5.8	3.35
278	0	70	105	0	0	0	0	0	0	0	59	0	78	71.9134	0	78	124	0	12.2	0	4.04	0.366	5.2	3.3	1.5	0.3	0.1	0	186	2.2	124	85.9	43.9	0	6.35	1.08	3.65	1.26	292	6.3	4.16
279	0	63	94.5	0	0	0	0	0	0	1	71	1	135	45.1837	1	117	128	0	13.6	0	4.47	0.41	10.1	6.817	2.101	0.929	0.202	0.051	239	3.24465	113.755	69.3	35.8	0	4.89	0.54	3.37	1.16	317	7.4	3.44
280	0	62.1	93.15	0	0	0	0	0	0	0	61	0	85	63.9122	0	65	136	0	14.1	0	4.54	0.415	6.2	2.728	2.635	0.62	0.198	0.019	266	1.03529	100.949	72.4	42.3	0	4.9	0.87	3.16	0.77	719	6.1	3.58
281	0	55	82.5	0	0	0	0	0	0	1	77	1	63	90.3583	0	69	102	1	13	0	3.18	0.306	5.9	3.729	1.21	0.802	0.13	0.029	272	3.08182	224.793	56.4	30.1	1	3.44	0.62	1.81	0.89	131	5.5	3.07
282	0	75	112.5	1	1	1	1	1	0	1	47	0	178	38.2839	1	201	169	0	13.7	0	5.79	0.484	5.9	2.974	1.935	0.726	0.206	0.059	116	1.53695	59.9483	74.2	35.9	0	4.48	2.03	2.55	0.64	317	12	2.37
283	0	57	85.5	0	0	1	0	1	1	1	62	0	159	39.4933	1	139	148	0	12.5	0	5.09	0.432	3.8	2.048	1.167	0.353	0.201	0.03	153	1.75493	131.105	64.2	35.8	0	5.37	0.93	3.76	1.04	591	4.8	3.54
284	0	52	78	0	0	0	0	0	0	0	45	0	76	81.8765	0	79	120	0	12.8	0	4.02	0.37	17.7	4.832	2.938	0.673	9.169	0.088	367	1.64466	124.915	68.1	40.2	0	4.52	2.61	2.49	0.82	318	5.2	3.81
285	0	52	78	0	0	0	0	0	0	1	30	0	92	95.8114	0	85	133	0	12.5	0	3.99	0.399	6.7	3.152	2.77	0.683	0.067	0.027	152	1.13791	54.8736	64.3	41.4	0	3.39	1.52	1.59	1.19	325	2	3.62
286	0	75	112.5	0	0	0	0	0	0	1	19	0	52	146.948	0	65	121	0	14.6	0	4.07	0.368	6.9	4.43	1.325	0.918	0.179	0.048	229	3.3434	172.83	63.6	36.9	0	3.29	1.59	1.73	0.66	284	4.3	3.37
287	0	68	102	0	1	0	0	1	0	1	47	0	61	113.044	0	81	157	0	13.2	0	4.95	0.456	13.4	8.34	3.305	1.487	0.228	0.04	213	2.52345	64.4478	71.6	40.7	0	4.84	1.93	2.75	1.31	228	4.8	2.34
288	0	65	97.5	0	1	0	0	1	0	0	67	1	89	57.9607	1	83	155	0	14.4	0	5.57	0.483	7.9	4.18	2.664	0.722	0.243	0.091	230	1.56907	86.3363	82.6	47.5	0	3.24	1.64	1.67	0.83	333	8.1	3.15
289	0	60	90	0	1	0	0	1	0	1	63	0	100	68.7008	0	67	138	0	13.2	0	4.9	0.397	8.9	6.025	1.718	0.792	0.294	0.071	150	3.50698	87.3108	65.4	39.2	0	1.93	0.12	0.7	0.77	288	4.9	2.69
290	0	45	67.5	0	0	0	0	0	0	1	68	1	66	94.4324	0	62	137	0	14.5	0	4.75	0.423	11.3	9.379	1.13	0.633	0.136	0.023	203	8.3	179.646	76.3	46.1	0	5.54	0.73	3.55	1.1	261	6	4.26
291	0	56	84	0	1	0	1	1	0	0	75	1	75	67.3894	0	91	122	0	13.4	0	4.03	0.366	6.9	3.602	2.312	0.725	0.2	0.062	211	1.55796	91.263	67.7	39.7	0	4.65	2.88	2.53	0.83	521	5.8	3.17
292	0	61	91.5	0	1	1	1	1	1	1	68	1	149	40.9568	1	118	137	0	13.3	0	3.82	0.373	7.9	4.013	3.018	0.545	0.292	0.032	140	1.32969	46.3883	69.6	37.3	0	5.29	5.45	3.1	0.54	489	5.1	3.72
293	0	60	90	0	1	0	0	1	1	1	66	1	82	85.5084	0	62	138	0	13.5	0	4.41	0.409	6.5	4.004	1.385	0.826	0.254	0.033	170	2.89097	122.744	71.7	37.2	0	5.3	1.64	3.57	0.93	377	4.5	3.86
294	0	70	105	1	1	0	1	1	0	0	58	0	97	55.6412	1	100	121	0	13.2	0	4.05	0.305	8.2	4.248	3.132	0.64	0.107	0.074	296	1.35632	94.5083	71.5	39.3	0	5.61	6.1	2.66	0.86	588	10.1	2.88
295	0	43	64.5	0	1	0	0	0	0	1	88	1	75	77.8553	0	88	97	1	13.3	0	3.42	0.302	7.5	4.29	1.567	1.26	0.352	0.03	168	2.73772	107.211	56.9	35	0	3.06	1.26	1.33	1.07	324	5.2	3.6
296	0	55	82.5	0	0	0	0	0	0	0	44	0	61	106.213	0	59	110	1	15.2	1	5.24	0.349	5.1	2.892	1.683	0.352	0.163	0.01	395	1.71836	234.7	76.2	48.1	0	4.91	1.55	3.15	0.96	269	4.7	3.86
297	0	44	66	0	0	0	0	0	0	0	39	0	46	120.714	0	48	140	0	12.1	0	4.29	0.395	5.3	3.715	1.15	0.392	0.011	0.032	289	3.23043	251.304	75.6	41.5	0	3.79	0.55	2.01	1.39	183	5	3.55
298	0	71	106.5	0	0	0	0	0	0	1	55	0	78	96.5967	0	63	135	0	13.4	0	4.66	0.4	10.1	5.818	2.889	1.03	0.081	0.283	243	2.01385	84.1121	60.2	32.2	1	4.48	3.57	2.84	0.31	231	11.2	3.6
299	0	82	123	0	1	0	0	0	0	1	56	0	95	76.7802	0	114	150	0	14.2	0	4.79	0.449	7.1	4.978	1.731	0.348	0.021	0.021	233	2.87579	134.604	67.5	38.4	0	6.55	0.73	4.93	1.64	311	5.3	3.75
300	0	63	94.5	0	0	0	0	0	0	1	63	0	87	81.2986	0	75	133	0	13.3	0	4.47	0.405	7.8	5.359	1.396	0.913	0.109	0.023	119	3.83883	85.2436	61.9	33.8	1	3.18	0.64	1.66	1.1	389	6.2	3.64
301	0	70	105	0	0	0	0	0	1	1	70	1	109	58.9329	1	102	126	0	12.4	0	4.19	0.391	5.6	2.509	2.206	0.577	0.286	0.022	158	1.13735	71.6228	68.3	36.7	0	5.15	0.97	3.21	1.32	539	5.9	3.84
302	0	35	52.5	0	0	0	0	0	0	0	35	0	50	120.794	0	63	126	0	12.8	0	4.39	0.38	6.8	2.761	3.298	0.632	0.102	0.007	168	0.837174	50.94	65.6	40.3	0	3.33	0.72	1.57	1.52	289	4.6	3.18
303	0	45	67.5	0	0	0	0	0	0	0	40	0	63	106.393	0	75	132	0	11.8	0	4.22	0.396	7	5.047	1.484	0.427	0.021	0.021	241	3.40094	162.399	71.2	44.4	0	4.32	0.92	3.04	1.32	258	6	3.18
304	0	52	78	0	0	0	0	0	1	1	85	1	88	68.7014	0	58	161	0	12.7	0	4.73	0.473	5.9	2.72	1.546	0.802	0.761	0.071	191	1.75938	123.545	59.1	35.4	0	3.97	1.83	2.22	0.96	419	6.6	3.71
305	0	74	111	1	1	0	1	1	0	1	54	0	195	32.6412	1	221	127	0	12.6	0	4	0.391	7.8	5.086	1.724	0.788	0.172	0.031	215	2.95012	124.71	69.4	39	0	5.1	1.53	3.39	0.82	374	4.2	3.52
306	0	68	102	0	1	0	1	0	0	0	66	1	84	62.5956	0	77	119	1	13.2	0	4.12	0.377	5.7	2.725	1.966	0.627	0.331	0.051	202	1.38606	102.747	70.3	37.3	0	4.97	2.29	2.98	0.89	582	4.5	3.05
307	0	55	82.5	0	1	0	0	1	0	1	72	1	59	96.1458	0	91	118	1	14.6	0	4.24	0.38	10.1	5.454	3.353	1.05	0.131	0.111	307	1.6266	91.5598	75.2	37	0	3.8	0.63	2.66	1.18	391	6.1	3.32
308	0	50	75	0	1	1	0	1	0	0	62	0	90	59.2272	1	83	119	1	14.8	0	5.9	0.382	9.8	6.027	2.842	0.774	0.108	0.049	266	2.12069	93.5961	79	39.8	0	4.85	2	3.48	0.96	562	4.4	3.28
309	0	49	73.5	0	0	0	0	0	0	0	51	0	61	101.116	0	55	97	1	11.7	0	3.14	0.298	7	4.18	2.064	0.742	0.007	0.007	153	2.02519	74.1279	63	40	0	3.7	1.07	1.99	1.22	216	5.9	3.64
310	0	52	78	0	0	0	0	0	0	0	25	0	54	126.344	0	36	123	0	14.1	0	4.33	0.376	3.7	2.054	1.295	0.252	0.081	0.018	165	1.5861	127.413	72.1	45.3	0	3.26	0.68	2.11	1.14	274	4.2	3.86
311	0	51.1	76.65	0	0	1	1	1	0	1	79	1	91	68.8127	0	113	98	1	14.4	0	2.97	0.3	9.3	6.207	2.256	0.586	0.223	0.028	138	2.75133	61.1702	56.9	30.9	1	2.19	0.66	0.91	0.94	153	5.1	3.16
312	0	62	93	0	0	0	0	0	1	1	62	0	75	93.4562	0	91	116	1	14	0	3.93	0.368	9.7	6.13	2.619	0.601	0.252	0.097	406	2.34059	155.021	69.4	29	1	4.24	0.86	2.98	0.6	331	5.2	3.99
313	0	57.5	86.25	1	1	0	0	0	0	1	67	1	77	89.2599	0	74	129	0	12.8	0	3.99	0.385	8.5	6.101	2.221	0.17	0	0.009	97	2.74696	43.674	62.4	34.7	1	3.27	2.72	0.46	0.08	275	7.4	3.33
314	0	75	112.5	0	0	1	0	0	1	1	51	0	67	105.755	0	94	144	0	12.3	0	4.68	0.431	7.9	4.471	2.741	0.6	0.063	0.024	246	1.63116	89.7483	69.2	41.9	0	4.17	1.84	2.43	0.75	387	12.1	3.62
315	0	43	64.5	0	1	1	0	0	0	0	81	1	86	54.7554	1	91	122	0	13.2	0	4.16	0.379	8.5	6.089	1.842	0.518	0.034	0.017	288	3.30565	156.352	68.3	33.7	1	3.45	1.3	1.89	0.85	413	6.3	3.54
316	0	68	102	1	1	0	0	0	0	1	60	0	66	99.8912	0	93	105	1	14	0	3.09	0.326	7.1	4.197	2.349	0.476	0.071	0.007	165	1.78672	70.2427	68.9	39.1	0	3.11	1.3	1.58	0.83	373	9.2	3.76
317	0	59	88.5	0	0	0	0	0	0	1	71	1	60	96.1571	0	61	147	0	12.4	0	4.54	0.425	7.1	4.495	2.037	0.525	0	0.043	257	2.20668	126.166	72.2	44.9	0	4.6	0.59	2.73	1.34	153	10.8	3.98
318	0	53	79.5	0	0	0	0	0	0	0	60	0	65	89.0204	0	67	128	0	12.7	0	4.25	0.399	7	3.486	2.751	0.602	0.119	0.042	315	1.26718	114.504	71.5	40.6	0	4.92	0.94	3.13	1.42	199	4.6	4.39
319	0	44	66	0	0	0	0	0	0	0	51	0	73	82.414	0	69	128	0	13.1	0	4.25	0.393	3.9	1.357	2.059	0.406	0.059	0.02	280	0.659058	135.988	66.9	43.8	0	5.62	1.4	3.65	1.21	204	4	3.94
320	0	65.9	98.85	1	1	0	0	1	0	0	58	0	58	97.8749	0	58	145	0	12.4	0	5.14	0.459	5.4	3.791	1.242	0.292	0.038	0.038	216	3.05233	173.913	69.9	41.4	0	5.9	2.32	3.74	1.01	234	15	3.5
321	0	51	76.5	0	1	0	0	1	0	0	63	0	58	94.4969	0	68	117	1	12.4	0	3.71	0.359	4.9	2.68	1.509	0.5	0.172	0.039	202	1.77601	133.863	63.6	39.1	0	2.56	1.08	1.12	0.99	401	4.6	2.93
322	0	68	102	1	0	0	0	1	0	1	74	1	102	62.0877	0	107	128	0	14	0	4.43	0.395	8.5	5.358	1.552	1.496	0.043	0.051	115	3.45232	74.0979	60.7	28	1	3.47	0.92	2.02	0.67	422	7.4	3.18
323	0	37	55.5	0	0	0	0	0	0	1	66	1	68	94.6006	0	81	136	0	12.3	0	5.08	0.442	5.8	3.961	1.195	0.36	0.267	0.017	168	3.31464	140.586	75.3	40.2	0	4.05	0.78	2.25	1.09	342	4.9	3.69
324	0	50	75	0	0	0	0	1	0	0	69	1	82	63.1021	0	98	108	1	13.4	0	3.9	0.334	9.9	6.574	2.693	0.554	0.05	0.03	222	2.44114	82.4359	71.5	35.1	0	3.84	2.06	1.61	0.7	431	6.7	3.53
325	0	58.3	87.45	0	1	0	0	1	0	1	77	1	111	54.8853	1	107	120	0	13.5	0	4.07	0.384	8.6	4.592	2.683	0.989	0.232	0.103	168	1.71152	62.6165	64.2	32.5	1	3.16	0.87	1.69	1.04	456	5.6	3.62
326	0	50	75	1	1	1	0	1	0	0	62	0	83	65.3183	0	89	119	1	14.8	0	5.9	0.382	9.8	6.527	2.342	0.774	0.108	0.049	266	2.78693	113.578	79	39.8	0	4.85	2	3.48	0.96	562	4.4	3.28
327	0	62.5	93.75	0	1	0	0	0	0	1	75	1	105	59.5299	1	66	139	0	12	0	4.3	0.435	7.7	4.743	1.956	0.67	0.231	0.1	305	2.42485	155.93	67.2	40.4	0	4	0.87	2.27	1.09	425	4.9	3.87
328	0	73	109.5	0	0	0	0	0	0	1	49	0	96	79.6354	0	95	140	0	13.2	0	4.71	0.443	6.5	4.011	1.891	0.435	0.149	0.013	277	2.1211	146.483	64.5	40.2	0	4.81	1.03	2.92	1.31	347	3.8	4.02
329	0	45.5	68.25	0	0	0	0	0	0	0	89	1	69	67.5556	0	66	101	1	13.4	0	3.77	0.338	7.6	4.2	2.7	0.5	0.2	0	290	1.55556	107.407	56.3	31.8	1	4.61	1.18	2.49	1.27	89	5.4	3.64
330	0	60	90	0	1	0	0	1	1	1	63	0	132	49.112	1	136	132	0	13.2	0	4.12	0.39	8.4	4.712	2.318	0.79	0.563	0.017	187	2.03279	80.673	63.5	37.4	0	4.32	1.98	2.51	0.59	440	5.3	4.13
331	0	63	94.5	1	0	1	1	1	0	1	77	1	124	48.007	1	143	105	1	15.9	1	3.53	0.35	7.9	5.862	1.383	0.608	0.04	0.008	226	4.23861	163.413	60.6	30.9	1	3.79	0.84	1.47	1.33	545	4.7	2.88
332	0	74	111	0	1	1	0	0	0	1	47	0	82	97.7176	0	98	150	0	13.2	0	4.99	0.452	5.7	3.283	1.545	0.735	0.108	0.029	188	2.12492	121.683	66.2	45.1	0	4.18	4.95	1.71	0.72	676	6.8	3.69
333	0	55	82.5	0	0	0	0	0	0	1	65	0	182	32.8423	1	151	118	1	13	0	3.94	0.369	15.9	11.388	3.244	1.161	0.095	0.032	194	3.51048	59.8027	68.8	42	0	4.64	0.6	2.69	1.41	327	7	3.87
334	0	67	100.5	0	1	0	0	1	0	1	50	0	101	74.3699	0	96	147	0	13	0	5.37	0.462	9.5	7.457	1.169	0.684	0.142	0.048	363	6.37896	310.522	66.2	39.5	0	2.61	1.64	1.28	0.73	550	4.7	3.21
335	0	63	94.5	0	0	0	0	0	0	1	43	0	120	63.423	0	122	139	0	13.5	0	4.71	0.432	6.4	3.955	1.67	0.448	0.301	0.026	198	2.36826	118.563	69.2	37.6	0	4.75	3.15	2.86	0.64	389	15.3	3.83
336	0	48	72	0	1	0	0	0	0	0	58	0	43	108.001	0	25	102	1	13.6	0	3.65	0.313	12.5	8.95	2.488	0.938	0.1	0.025	190	3.59727	76.3666	54.7	27.6	1	3.22	1.05	2.05	0.73	162	5.8	3.49
337	0	55	82.5	1	1	0	0	1	1	1	53	0	81	95.0848	0	61	164	0	13.6	0	5.47	0.503	11.1	7.437	2.93	0.588	0.1	0.044	176	2.53823	60.0683	70	43.2	0	5.6	3.21	3.55	0.65	316	7.9	2.88
338	0	63	94.5	0	1	0	0	1	1	1	60	0	55	107.664	0	62	160	0	12.5	0	5.18	0.482	11.8	7.983	2.991	0.791	0.012	0.024	212	2.66901	70.8793	80.2	48.5	0	4.74	1.7	2.93	0.83	238	5.8	3.55
339	0	65	97.5	0	0	0	1	1	1	1	54	0	108	66.6821	0	97	145	0	14	0	4.83	0.453	9.1	6.67	2.102	0.137	0.173	0.018	250	3.17317	118.934	73.8	45.2	0	6.54	2.21	4.03	1.23	570	6	3.48
340	0	65	97.5	1	1	0	0	1	1	1	43	0	58	118.701	0	67	144	0	12.5	0	4.64	0.424	5.7	3.249	1.636	0.581	0.182	0.051	208	1.98594	127.139	62.8	39.6	0	2.52	1.36	0.98	0.67	237	10.9	2.83
341	0	73	109.5	0	1	1	1	1	0	1	81	1	145	38.6326	1	155	109	1	13.4	0	3.36	0.336	13	8.971	2.963	0.897	0.117	0.052	190	3.02767	64.1242	62.7	34.4	1	6.78	1.69	4.45	0.97	753	9	3.29
342	0	75	112.5	0	1	0	0	1	1	1	49	0	75	102.392	0	68	163	0	12.9	0	5.06	0.477	6.8	3.809	1.907	0.804	0.254	0.027	214	1.99738	112.218	66.8	39.2	0	3.53	1.45	1.72	0.78	319	3.9	2.85
343	0	49	73.5	1	1	0	0	1	0	0	78	1	76	64.9359	0	76	125	0	13.3	0	4.24	0.396	5.9	3.044	2.372	0.389	0.083	0.012	180	1.28331	75.8853	69.5	36.9	0	6.16	1.23	3.32	0.98	226	8.5	4
344	0	65	97.5	0	1	0	0	0	0	1	63	0	86	82.4429	0	81	113	1	13.3	0	3.77	0.345	10.7	7.051	2.718	0.813	0.086	0.032	228	2.59419	83.8852	60.2	37.3	0	4.66	3.38	2.74	0.75	340	7.6	3.37
345	0	58	87	1	0	0	0	0	0	0	59	0	88	62.1545	0	83	129	0	13.1	0	4.47	0.389	16	10.376	4.344	1.072	0.176	0.032	271	2.38858	62.3849	59.4	34.5	1	5.33	2.09	2.95	1.5	563	6.5	2.16
346	0	60	90	0	0	0	0	0	0	0	64	0	106	47.9186	1	63	135	0	13.8	0	4.8	0.434	7.2	5.846	1.102	0.13	0	0.122	130	5.3049	117.967	67.2	33.6	1	3.91	2.03	2.09	0.55	252	4.2	3.95
347	0	69	103.5	0	0	0	0	0	0	0	47	0	64	99.3779	0	70	128	0	14.2	0	3.89	0.351	6.3	3.906	1.789	0.485	0.082	0.038	168	2.18334	93.9072	66.9	39.1	0	20.15	16	1.16	0.92	352	8.3	3.31
348	0	65	97.5	0	0	0	0	0	0	0	63	0	83	64.8611	0	81	125	0	12.5	0	4.09	0.377	8.8	5.306	2.587	0.669	0.211	0.026	218	2.05102	84.2675	67.6	40.1	0	5.04	1.61	2.85	1.22	314	7.1	3.94
349	0	61	91.5	0	1	0	0	1	0	0	78	1	83	58.3744	1	78	128	0	13.3	0	4.32	0.389	6.7	4.2	2	0.4	0.1	0	223	2.1	111.5	74.7	42.8	0	5.25	1.74	3.1	1.27	371	10	3.74
350	0	59	88.5	0	1	0	0	0	0	1	73	1	76	86.037	0	77	112	1	12.2	0	3.42	0.336	12.9	10.171	2.032	0.606	0.065	0.026	180	5.00541	88.5827	61.4	38.8	0	4.02	0.68	2.22	1.44	349	6.3	3.44
351	0	64.8	97.2	0	0	0	0	0	0	1	68	1	139	44.5454	1	150	126	0	16.3	1	5.28	0.395	9.3	6.231	1.534	1.432	0.084	0.019	167	4.06193	108.866	67.9	40.1	0	4.03	0.99	2.61	0.97	398	5.4	3.74
352	0	63	94.5	1	1	1	1	1	0	1	73	1	90	72.7403	0	90	131	0	13.2	0	4.28	0.396	8.5	5.228	2.219	0.884	0.136	0.034	296	2.35602	133.393	61.2	40.5	0	3.46	1.97	2.27	0.6	483	9.6	3.15
353	0	54	81	0	0	0	0	0	0	1	51	0	81	96.43	0	76	143	0	13.3	0	5.09	0.462	11.3	7.108	3.288	0.554	0.305	0.045	304	2.1618	92.4574	61.9	40	0	5.93	1.66	3.82	1.57	386	9.4	3.73
354	0	59	88.5	0	1	0	0	0	0	1	83	1	82	75.8832	0	85	112	1	14.1	0	3.86	0.342	15	10.98	3.54	0.465	0	0.015	198	3.10169	55.9322	73.7	40.8	0	4.44	1.01	2.56	1.07	300	10	3.23
355	0	70	105	0	1	0	0	1	0	1	54	0	126	55.344	1	99	161	0	13.4	0	5.45	0.5	8.3	4.739	2.515	0.772	0.232	0.042	245	1.88429	97.4155	70.8	41.1	0	4.62	1.25	2.91	0.86	407	5.2	3.55
356	0	65	97.5	0	1	0	0	1	0	1	53	0	127	55.204	1	97	152	0	13.1	0	4.86	0.473	12.5	5.188	5.513	1.488	0.188	0.125	307	0.941048	55.6866	66.6	39.3	0	6.26	2.27	3.7	1.22	634	5	4.59
357	0	57	85.5	0	1	1	1	1	1	1	62	0	91	77.541	0	85	124	0	15.2	1	3.71	0.382	6.6	3.8	2.2	0.5	0.1	0	115	1.72727	52.2727	64.8	38.9	0	4.62	0.42	2.43	1.76	435	6.1	3.01
358	0	71	106.5	0	1	0	0	1	0	1	66	1	145	42.9255	1	143	149	0	12.9	0	4.95	0.454	8.3	5.876	1.519	0.689	0.183	0.033	185	3.86833	121.791	71	38.1	0	4.94	1.27	3.07	1.22	403	4.8	3.19
359	0	59	88.5	0	1	0	0	1	0	0	64	0	57	94.3738	0	70	118	1	12.5	0	3.83	0.366	14.5	10.021	3.45	1	0.015	0.015	218	2.90464	63.1884	74	42.1	0	6.17	1.59	4.03	1.27	250	4.3	3.04
360	0	62	93	0	1	0	0	1	0	1	73	1	79	84.6789	0	75	123	0	14.1	0	3.91	0.384	5.4	2.797	1.987	0.427	0.151	0.038	247	1.40765	124.308	66	35.6	0	4.87	2.33	2.95	0.84	246	4.4	3.25
361	0	68	102	0	0	0	0	0	0	1	54	0	84	90.3576	0	104	144	0	11.9	0	4.23	0.432	6.2	3.77	1.755	0.552	0.093	0.031	186	2.14815	105.983	65.1	41	0	5.59	4.24	2.89	0.77	424	4.6	3.51
362	0	60	90	0	1	0	0	1	0	1	80	1	80	80.2	0	101	133	0	13.8	0	4.43	0.41	9.3	5.692	2.065	1.069	0.437	0.037	230	2.75642	111.38	75.9	38.3	0	5.63	3.16	3.28	0.77	618	5.3	4
363	0	57	85.5	0	0	0	0	0	0	1	50	0	46	124.301	0	54	136	0	14	0	5.14	0.417	6	4.008	1.344	0.588	0.048	0.012	210	2.98214	156.25	68.3	40.8	0	4.4	1.4	2.78	0.8	293	3.9	3.73
364	0	39	58.5	0	0	0	0	0	0	1	79	1	70	85.3218	0	72	129	0	12.6	0	3.89	0.391	9.2	6.863	1.822	0.276	0.147	0.092	146	3.76674	80.1317	63.6	28.9	1	3.83	1.18	2.38	0.52	186	8.6	3.18
365	0	69	103.5	0	0	0	0	0	0	1	36	0	75	112.183	0	76	149	0	13.2	0	4.8	0.466	9.3	5.403	2.827	0.781	0.251	0.037	298	1.91121	105.412	76	40.2	0	4.62	1.63	2.65	1.16	417	4.9	3.94
366	0	74	111	0	0	0	0	0	0	1	68	1	96	69.6854	0	116	157	0	13.1	0	5.03	0.468	7	4.502	1.749	0.406	0.315	0.028	240	2.57404	137.221	84.1	47.8	0	5.3	1.65	3.47	0.93	506	5.3	4.55
367	0	50	75	0	0	0	0	0	0	1	23	0	83	113.979	0	89	139	0	13.6	0	4.54	0.447	6	2.358	2.388	0.864	0.33	0.06	322	0.987437	134.841	64.4	67	0	3.14	0.51	1.81	0.61	354	4	4.43
368	0	49	73.5	0	0	0	0	1	0	0	52	0	73	81.8371	0	71	135	0	12.3	0	4.65	0.416	5	2.66	1.94	0.3	0.07	0.03	175	1.37113	90.2062	70.4	41.2	0	5.07	2.29	1	0.89	326	6.8	3.33
369	0	65	97.5	1	1	1	1	1	1	1	84	1	140	39.4664	1	148	134	0	14	0	4.48	0.419	9.4	5.424	2.331	1.147	0.461	0.038	191	2.3269	81.9391	81.8	43.9	0	5.72	1.34	3.32	1.09	427	6.89	3.8
370	0	54	81	1	1	1	1	1	0	0	74	1	110	42.7118	1	105	125	0	12.8	0	4.25	0.396	6.2	3.491	1.934	0.515	0.229	0.031	303	1.80507	156.67	63.7	39.7	0	5.21	1.71	3.24	1.08	439	6.8	4.42
371	0	69	103.5	1	1	0	1	1	0	1	48	0	116	63.796	0	105	158	0	13.7	0	5.49	0.479	10.6	5.692	3.466	1.039	0.307	0.095	339	1.64224	97.8073	69.7	43.1	0	3.32	3.09	1.54	0.69	633	5.2	4.29
372	0	54	81	1	1	1	1	1	0	0	74	1	110	42.7118	1	105	125	0	12.8	0	4.25	0.396	6.2	3.491	1.934	0.515	0.229	0.031	303	1.80507	156.67	63.7	39.7	0	5.21	1.71	3.24	1.08	439	6.8	4.42
373	0	69	103.5	1	1	0	1	1	0	1	48	0	116	63.796	0	105	158	0	13.7	0	5.49	0.479	10.6	5.692	3.466	1.039	0.307	0.095	339	1.64224	97.8073	69.7	43.1	0	3.32	3.09	1.54	0.69	633	5.2	4.29
374	0	55	82.5	0	1	0	0	0	0	1	80	1	87	72.1473	0	90	123	0	12.4	0	4.07	0.367	10.9	6.704	2.365	1.297	0.48	0.054	272	2.83467	115.011	65.5	37	0	3.85	1.74	2.11	0.88	432	6.2	4.34
375	0	47	70.5	0	0	0	0	0	0	0	62	0	64	89.4393	0	71	119	1	13.1	0	4.15	0.369	6	3.372	1.704	0.786	0.09	0.048	221	1.97887	129.695	69.4	39.8	0	4.52	1.38	2.67	1.17	252	4.6	2.89
376	0	83	124.5	1	1	1	1	1	0	1	70	1	127	48.99	1	112	136	0	12.6	0	4.47	0.42	10	5.71	3.25	0.82	0.18	0.04	208	1.75692	64	76.1	45.3	0	3.17	1.52	1.62	0.7	635	7.2	4.6
377	0	66	99	1	1	1	0	1	0	0	77	1	99	47.5024	1	72	117	1	12.3	0	3.7	0.37	13	8.607	3.21	1.105	0.039	0.039	277	2.68131	86.2928	64.6	37.5	0	5.16	3.05	3.22	0.94	695	7.9	4.48
378	0	47.9	71.85	0	0	0	0	0	0	0	73	1	57	88.5921	0	46	120	0	13.1	0	3.83	0.378	8	5	2.752	0.208	0.008	0.032	167	1.81686	60.6831	78.9	42.6	0	3.94	0.54	1.59	2.28	291	7.6	3.24
379	0	50	75	0	0	0	0	0	1	1	59	0	84	87.2391	0	88	112	1	13.7	0	4.04	0.356	9.7	5.781	2.435	0.97	0.475	0.039	387	2.37413	158.932	73.6	34.8	1	3.55	0.5	1.85	1.17	550	5	3.56
380	0	60	90	0	0	0	0	0	0	1	56	0	73	98.5682	0	84	134	0	12.1	0	4.14	0.43	4.8	2.434	1.661	0.538	0.139	0.029	269	1.46538	161.951	73.8	44.9	0	5.38	1.57	3.29	0.71	347	5	3.99
381	0	52	78	1	0	0	0	0	0	0	44	0	67	96.0261	0	66	155	0	11.9	0	5.35	0.462	8.1	3.734	3.37	0.397	0.526	0.073	287	1.10801	85.1632	73.9	43.7	0	6.68	1.51	4.51	1.33	390	7.9	3.71
382	0	55	82.5	0	0	0	0	0	0	0	56	0	52	102.891	0	55	137	0	12.7	0	4.74	0.417	5.3	2.926	1.95	0.323	0.09	0.011	141	1.50051	72.3077	78.2	46.2	0	5.58	1.18	3.51	1.25	320	6	4.32
383	0	52	78	0	0	0	0	0	0	1	75	1	93	68.9377	0	110	112	1	12	0	3.5	0.334	6.8	3.74	1.972	0.877	0.15	0.061	288	1.89655	146.045	66.4	38.1	0	3.11	0.46	1.07	1.7	240	4.3	3.81
384	0	61	91.5	0	0	0	0	0	1	1	59	0	85	85.9998	0	86	138	0	11.6	0	4.38	0.439	6	2.934	2.118	0.69	0.228	0.03	192	1.38527	90.6516	80.5	46	0	4.06	0.64	2.49	1.22	344	5.4	4.49
385	0	78	117	1	1	1	1	1	1	1	78	1	148	38.4905	1	105	138	0	13.8	0	4.65	0.431	8.2	5.699	1.542	0.713	0.213	0.033	186	3.69585	120.623	66	36	0	6.26	2.72	4.24	0.83	440	8	4.15
386	0	74	111	1	1	0	1	1	0	1	80	1	236	21.5898	1	233	126	0	14.5	0	4.37	0.388	14.7	8.085	3.998	1.426	1.176	0.015	232	2.02226	58.029	60.1	28.7	1	6.39	2.38	4.35	0.78	440	7.9	3.06
387	0	52	78	0	1	1	1	1	0	0	75	1	79	63.2862	0	81	132	0	14	0	4.33	0.406	5.8	3.579	1.491	0.435	0.278	0.017	244	2.4004	163.649	68.4	39.4	0	5.55	1.43	3.63	1.28	532	5.6	4.33
388	0	68	102	1	1	1	1	1	0	1	74	1	173	32.7798	1	151	110	1	14.1	0	3.78	0.347	12.4	7.568	2.637	1.835	0.347	0.012	319	2.86993	120.971	66.7	34.8	1	3.17	1.8	1.72	0.38	460	8.1	4.06
389	0	68.4	102.6	0	1	0	1	0	1	1	45	0	102	76.1163	0	108	160	0	12.9	0	5.21	0.478	11.7	7.986	2.685	0.983	0.035	0.012	151	2.9743	56.2384	64.8	35.2	0	3.55	0.96	1.78	0.78	285	7.9	3.38
390	0	64	96	0	0	0	0	0	0	0	60	0	54	98.8052	0	50	96	1	13.4	0	3.36	0.293	4.1	1.935	1.669	0.394	0.082	0.021	181	1.15938	108.448	69.8	43	0	5.33	1.65	3.65	1.09	254	5.9	3.68
391	0	41	61.5	0	1	0	0	0	1	0	70	1	47	96.4073	0	35	133	0	11.9	0	4.04	0.396	8.4	5.611	2.042	0.731	0.008	0.008	354	2.7478	173.359	78	48.2	0	6.09	0.86	3.57	1.95	117	6.7	3.86
392	0	66	99	0	0	0	0	0	0	1	47	0	86	92.2497	0	89	156	0	13.3	0	5.16	0.477	11.4	8.6	2.2	0.6	0	0	321	3.90909	145.909	68.5	41.3	0	6.05	1.44	3.44	0.94	290	6.6	3.3
393	0	70	105	1	0	0	0	0	1	1	51	0	61	109.912	0	54	131	0	12.9	0	4.21	0.404	4.8	2.686	1.806	0.259	0.038	0.01	117	1.48726	64.7841	69.7	38.9	0	10.5	19.24	1.02	0.94	689	16.8	4.45
394	0	68.5	102.75	0	1	0	0	0	0	0	61	0	97	54.4809	1	82	131	0	13.8	0	4.17	0.401	5.8	3.7	1.38	0.644	0.058	0.017	348	2.68116	252.174	69.1	35.9	0	4.74	1.66	1.79	0.37	268	6.9	4.08
395	0	75	112.5	0	0	0	0	0	1	1	36	0	78	110.389	0	86	150	0	13.9	0	4.91	0.443	9.9	6.603	2.386	0.723	0.158	0.03	187	2.76739	78.3738	64.9	34.5	1	11.47	9.54	5.5	0.6	488	13.5	3.29
396	0	80	120	0	1	1	0	0	0	1	64	0	81	88.0142	0	68	136	0	14.7	0	5.12	0.433	16.6	12.425	3.079	1.062	0.017	0.017	264	4.0354	85.7421	77.2	46.1	0	5.02	0.72	3.2	1.62	367	5.1	4.4
397	0	60	90	0	0	0	0	0	0	0	58	0	56	99.0114	0	67	134	0	12.7	0	4.26	0.416	16.9	13.362	3.234	0.287	0	0.017	248	4.13173	76.6852	64.4	38	0	4.45	0.8	1.7	2.06	129	10.2	4.04
398	0	80.5	120.75	0	0	0	0	0	0	1	45	0	112	67.9784	0	116	143	0	13	0	4.99	0.433	6.5	4.589	1.404	0.319	0.169	0.02	208	3.26852	148.148	72.3	45.2	0	3.97	0.45	2.27	1.13	446	5.3	4.24
399	0	62	93	1	0	0	0	0	0	0	53	0	45	110.201	0	46	133	0	11.9	0	4.03	0.403	6.2	3.565	2.096	0.459	0.068	0.012	165	1.70086	78.7214	65.3	40.9	0	6.29	3.78	3.51	0.87	178	13.2	3.65
400	0	59	88.5	0	0	0	0	0	0	0	47	0	75	82.0375	0	70	133	0	12.4	0	4.34	0.398	7.6	4.188	2.652	0.616	0.122	0.023	293	1.57919	110.483	70.8	42.5	0	4.65	0.38	2.67	2.27	171	5.4	4.82
401	0	46	69	0	1	0	0	0	0	1	79	1	74	83.3952	0	76	146	0	12.8	0	5.22	0.468	9.5	7.106	1.567	0.779	0.029	0.019	89	4.53478	56.7964	69.4	38.9	0	3.99	0.63	2.51	0.86	281	8.6	3.44
402	0	58	87	0	0	0	0	0	0	0	62	0	71	78.8913	0	70	123	0	12.3	0	4.15	0.381	4.9	2.631	1.808	0.382	0.039	0.039	234	1.4552	129.425	63.5	36.6	0	4.58	1.33	2.79	1.16	253	6.3	3.41
403	0	49	73.5	0	0	0	0	0	0	1	79	1	133	43.4924	1	83	107	1	13.7	0	3.53	0.346	12.2	8.76	3.281	0.085	0.049	0.024	170	2.66992	51.8135	55.1	30.1	1	3.11	0.59	1.84	0.8	387	5.6	4.11
404	0	72	108	1	1	0	0	1	0	1	48	0	85	92.9085	0	86	114	1	14.9	0	5.81	0.373	9.6	5.874	2.603	1.056	0.048	0.019	209	2.25663	80.292	71.6	44	0	5.81	3.91	2.82	0.99	688	14.5	3.77
405	0	70	105	0	1	0	0	1	0	1	73	1	163	35.4748	1	147	126	0	13.5	0	4.26	0.391	13.2	8.055	3.059	1.148	0.911	0.026	303	2.63321	99.052	70	31.2	1	3.34	0.55	1.89	1.21	445	5	3.98
406	0	52	78	1	0	0	0	1	1	1	65	0	60	100.296	0	69	146	0	12.7	0	4.61	0.459	8	4.776	2.288	0.616	0.28	0.04	236	2.08741	103.147	42.2	36.8	0	4.04	0.86	2.64	0.7	365	5.5	3.33
407	0	51	76.5	0	1	0	1	1	0	0	51	0	68	89.7956	0	59	149	0	15.9	1	5.9	0.465	7.9	5.19	2.37	0.269	0.032	0.04	269	2.18987	113.502	82.3	43.7	0	7.78	1.39	5.46	1.56	357	5.5	3.14
408	0	63	94.5	0	1	0	0	1	0	0	60	0	66	87.3923	0	56	131	0	16.7	1	6.53	0.45	6.4	4.1	1.4	0.5	0.3	0.1	568	2.92857	405.714	80.8	45.7	0	3.59	2.8	1.78	0.73	512	4.2	4.67
409	0	62	93	1	1	0	0	1	1	1	66	1	49	108.239	0	56	126	0	12.6	0	4.07	0.36	10.4	5.71	2.486	1.778	0.395	0.031	206	2.29686	82.864	64	34.9	1	2.78	0.71	1.23	1.03	70	7.9	3.11
410	0	72	108	1	0	0	0	1	0	1	57	0	128	53.1679	1	129	118	1	12.8	0	3.8	0.348	4.2	2.562	1.121	0.416	0.08	0.021	91	2.28546	81.1775	63.1	38.5	0	2.51	0.85	1.41	0.94	396	12.1	3.61
411	0	60	90	0	0	0	0	1	1	1	50	0	99	76.1901	0	92	134	0	14.2	0	4.12	0.411	16	11.632	3.008	1.248	0.064	0.048	373	3.86702	124.003	65.3	39.3	0	4.1	1.08	2.41	1.05	401	3	2.98
412	0	45	67.5	0	0	0	0	0	0	1	73	1	68	90.0614	0	76	122	0	13.8	0	4.15	0.385	4.6	3.252	0.874	0.373	0.06	0.041	168	3.72082	192.22	69.2	36	0	4.48	0.73	2.66	1.21	490	4.9	3.99
413	0	59.9	89.85	0	0	0	0	1	1	1	59	0	82	89.8181	0	72	140	0	12.6	0	4.19	0.414	10.3	6.562	2.998	0.57	0.148	0.022	303	2.18879	101.067	65.7	31.6	1	5.75	1.33	2.71	0.79	137	7	4.02
414	0	75	112.5	0	0	0	0	1	0	1	35	0	75	112.974	0	92	141	0	13.3	0	4.7	0.443	11.7	7.605	2.925	1.041	0.105	0.023	255	2.6	87.1795	67.7	36.7	0	4.21	1.61	2.28	0.69	391	4.2	3.83
415	0	70	105	0	0	1	0	1	0	1	67	1	73	91.2386	0	77	119	1	12.6	0	4.11	0.362	13.9	10.705	2.556	0.612	0.014	0.014	235	4.18818	91.9405	57.4	34.9	1	2.83	0.85	1.5	0.56	323	5.9	3.8
416	0	64	96	0	1	0	0	1	0	1	50	0	81	97.1098	0	91	141	0	13.2	0	4.68	0.421	11.7	7.757	2.527	1.1	0.281	0.035	218	3.06965	86.2683	66.1	40.7	0	4.89	1.48	3.2	0.83	504	6.1	3.56
417	0	73	109.5	0	1	0	0	1	0	0	52	0	59	101.516	0	59	142	0	12.5	0	4.58	0.441	6.3	4.076	1.594	0.529	0.069	0.032	200	2.55709	125.471	65.5	41.1	0	4.56	0.76	2.64	1.23	302	5.1	3.02
418	0	64.6	96.9	0	0	1	0	1	0	1	65	0	89	77.9916	0	68	151	0	12.7	0	4.92	0.455	14.6	9.877	3.248	1.372	0.088	0.015	204	3.04095	62.8079	66.3	39.3	0	3.77	2.3	1.98	0.8	398	5.8	3.56
419	0	54	81	0	0	0	0	0	0	0	54	0	92	61.008	0	71	126	0	13.6	0	4.22	0.404	5.4	3.31	1.415	0.535	0.081	0.059	294	2.33922	207.774	74.2	42.9	0	6.9	1.07	4.51	1.82	313	5.5	4.22
420	0	69	103.5	0	1	0	0	0	0	1	62	0	89	79.6526	0	74	140	0	13.1	0	4.92	0.449	8.5	4.454	2.745	0.79	0.468	0.043	222	1.62259	80.8743	69.8	37.9	0	6.57	1.74	4.36	0.93	433	5.5	3.77
421	0	55	82.5	1	1	1	0	1	0	0	69	1	56	91.6488	0	50	105	1	12.5	0	3.47	0.327	5.4	3.191	1.744	0.373	0.081	0.011	226	1.8297	129.587	65.8	35.8	0	4.8	1.72	2.78	0.85	302	12.6	3.67
422	0	75	112.5	0	0	0	0	0	0	1	55	0	130	52.9188	1	120	154	0	12.9	0	5.19	0.488	6.3	3.251	1.814	0.706	0.46	0.069	201	1.79217	110.805	69.5	45.5	0	4.85	1.22	3.33	0.93	525	4.8	4.56
423	0	52	78	0	1	0	0	0	0	0	52	0	67	90.7786	0	63	114	1	13.4	0	3.67	0.368	5.7	4.207	0.901	0.553	0.011	0.029	191	4.66926	211.987	74.4	44.8	0	5.75	0.63	3.03	2.09	299	5.7	2.78
424	0	51	76.5	0	0	0	0	0	0	0	32	0	53	121.024	0	48	130	0	14.3	0	4.63	0.415	5.8	3.115	2.036	0.528	0.081	0.041	245	1.52996	120.334	74.8	43.2	0	4.24	0.68	1.85	1.35	295	4.3	4.46
425	0	35	52.5	0	0	0	0	0	0	0	78	1	75	65.9841	0	59	119	1	14.1	0	3.87	0.363	4.85	2.304	1.028	0.548	0.921	0.049	188	2.24125	182.879	56.2	29.9	1	3.1	0.87	1.23	1.13	421	4.7	4.26
426	0	51	76.5	0	0	1	0	0	0	0	54	0	60	99.5475	0	44	137	0	13	0	4.85	0.439	6.9	4.464	1.822	0.414	0.159	0.041	244	2.45005	133.919	76.5	43.9	0	4.88	0.8	2.91	1.15	497	3.6	3.37
427	0	73	109.5	0	0	0	0	0	0	1	30	0	95	92.1656	0	99	157	0	14.2	0	5.42	0.496	3.8	1.832	1.623	0.274	0.042	0.03	157	1.12877	96.7344	80.2	46.7	0	4.2	0.9	2.81	0.8	634	4.9	4.1
428	0	39	58.5	0	0	1	0	0	0	0	85	1	61	79.6334	0	74	92	1	15	0	4.47	0.301	9.9	6.683	1.564	1.059	0.574	0.02	372	4.27302	237.852	62.7	36	0	4.99	0.86	2.88	1.49	217	5.4	4.23
429	0	56	84	0	0	0	0	0	1	1	32	0	76	114.754	0	74	144	0	15.7	1	4.29	0.414	5.8	3.345	1.55	0.882	0.012	0.012	210	2.15806	135.484	60.3	42.1	0	6.1	1.72	3.47	1.77	382	5.5	3.51
430	0	43	64.5	0	0	0	0	0	0	0	58	0	76	74.7308	0	54	98	1	13.9	0	3.02	0.299	9.1	6.261	1.82	0.783	0.191	0.045	179	3.44011	98.3516	66.3	36.2	0	3.86	1.12	2.11	1.3	205	4.2	3.73
431	0	50	75	0	0	0	0	0	0	0	76	1	51	89.9777	0	58	144	0	13.1	0	4.55	0.443	9.4	6.68	2.053	0.639	0.009	0.019	237	3.25377	115.441	61.8	41.3	0	5.11	0.99	2.88	1.57	166	6.2	3.84
432	0	69	103.5	0	0	0	0	1	0	1	78	1	90	70.2298	0	60	135	0	13.3	0	4.37	0.409	4.8	2.352	1.886	0.48	0.062	0.019	139	1.24708	73.701	72.6	40.8	0	3.74	1.13	1.98	1.11	428	5.9	3.97
433	0	75	112.5	0	1	0	1	1	1	1	67	1	106	62.2535	0	80	155	0	12.8	0	4.79	0.446	8.1	3.604	3.442	0.834	0.17	0.049	343	1.04707	99.6514	79.2	41.5	0	4.25	0.58	3.05	1.07	649	5.2	3.2
434	0	55.3	82.95	0	1	0	0	0	0	1	83	1	51	94.4889	0	58	112	1	13.2	0	4.03	0.364	9	7.344	0.882	0.675	0.063	0.027	110	8.32653	124.717	68.3	38.7	0	2.76	0.71	1.77	0.49	220	5.2	3.23
435	0	51	76.5	0	1	0	1	0	0	0	59	0	67	86.4227	0	70	116	1	13.4	0	3.91	0.365	7.1	3.612	2.432	0.834	0.17	0.049	277	1.4852	113.898	75.5	35.6	0	4.32	2.29	2.01	1.08	336	5.1	2.83
436	0	65	97.5	0	1	0	0	1	1	1	64	0	67	96.525	0	77	150	0	13.8	0	4.53	0.449	11.8	8.118	2.454	0.708	0.425	0.094	260	3.30807	105.949	71.9	41.6	0	5.57	3	3.59	0.95	475	6	3.27
437	0	75	112.5	1	1	1	0	1	0	1	66	1	155	39.6003	1	123	128	0	13.1	0	4.09	0.39	8.1	5.727	1.377	0.899	0.089	0.008	226	4.15904	164.125	62	36.6	0	6.91	1.99	3.5	1.46	454	10.3	3.13
438	0	65.5	98.25	1	1	1	1	1	0	1	82	1	105	56.6734	1	93	144	0	12.5	0	4.65	0.444	5.8	3.097	1.798	0.754	0.099	0.052	181	1.72247	100.667	70.5	35.7	0	5.8	0.86	4.14	1.04	492	6.8	4.21
439	0	75	112.5	1	1	0	0	0	1	1	70	1	102	63.8571	0	89	130	0	15.9	1	4.36	0.406	8.5	5.567	1.598	1.02	0.272	0.043	305	3.48373	190.864	67.4	36.1	0	4.05	0.82	2.59	1.17	371	4.4	3.17
440	0	60	90	1	1	0	0	1	0	1	63	0	65	98.4238	0	58	132	0	13.3	0	4.54	0.4	8.7	5.438	2.166	0.827	0.244	0.026	331	2.51062	152.816	59.4	32.1	1	4.7	1.05	3.14	0.94	258	6.3	3.36
441	0	83	124.5	0	1	0	1	0	0	1	53	0	77	98.4843	0	85	157	0	13.1	0	5.19	0.494	10.9	7.709	2.417	0.665	0.087	0.022	148	3.18949	61.2329	77.7	42.2	0	4.01	0.88	2.5	1.27	302	5.7	3.96
442	0	76	114	0	1	0	0	1	1	1	54	0	85	89.074	0	83	159	0	14	0	5.46	0.489	6.9	5.003	1.339	0.517	0.021	0.021	278	3.73637	207.618	63.6	34.6	1	5.04	1.58	2.92	1.02	378	5.8	3.75
443	0	64.2	96.3	0	1	0	1	1	0	1	55	0	74	98.7095	0	78	133	0	12.4	0	4.33	0.394	11.9	7.793	2.993	0.692	0.364	0.073	200	2.60374	66.8226	65.9	35.5	0	5.1	1.12	3.54	1.05	422	5.9	2.87
444	0	75	112.5	0	1	1	0	0	0	0	72	1	52	91.9525	0	52	134	0	13.7	0	4.53	0.422	12.5	8.6	2.525	1.325	0.025	0.025	180	3.40594	71.2871	70.6	33.8	1	5.21	0.8	2.73	1.34	125	8.1	4.11
445	0	48	72	0	0	0	0	0	0	1	66	1	83	84.2644	0	99	114	1	13.1	0	3.83	0.347	9	7.1	1.3	0.5	0.1	0	389	5.46154	299.231	77.2	31.6	1	3.94	0.99	2.75	0.48	355	8.2	3.56
446	0	75	112.5	1	0	0	0	0	0	1	60	0	66	99.8912	0	63	124	0	13.4	0	4.28	0.393	8.5	4.165	3.757	0.391	0.144	0.043	136	1.1086	36.1991	60.8	33.5	1	4.96	4.63	2.2	1.07	256	10.8	3.46
447	0	73	109.5	1	1	1	1	1	0	0	75	1	84	58.7607	1	69	126	0	15.3	1	4.29	0.385	11.4	8.037	2.303	1.015	0.023	0.023	187	3.4898	81.1984	64.8	35.8	0	3.2	0.7	2.29	0.63	577	7.4	4.01
448	0	75	112.5	0	1	0	1	0	1	1	62	0	64	99.7512	0	61	129	0	14.4	0	4.75	0.394	13.4	9.171	2.742	1.394	0.08	0.013	129	3.34464	47.046	70.5	40.8	0	3.3	1.29	1.74	1.02	622	8.6	3.54
449	0	55.2	82.8	0	0	0	0	0	0	0	72	1	68	77.48	0	69	131	0	12.4	0	4.19	0.39	9.3	6.217	2.395	0.679	0	0.009	291	2.59582	121.503	76.6	42	0	7.58	1.15	5	1.66	231	5.8	3.84
450	0	80	120	1	0	0	0	0	0	1	56	0	93	78.7809	0	108	126	0	12.7	0	4.48	0.389	12	8.756	2.404	0.732	0.036	0.072	329	3.64226	136.855	77.8	40.7	0	3.49	0.97	2.13	0.75	414	11	4.2
451	0	53	79.5	0	1	0	0	0	0	0	52	0	56	103.274	0	54	141	0	13.9	0	5.27	0.465	4.4	2.605	1.069	0.515	0.18	0.031	247	2.43686	231.057	73.8	40	0	4.03	1.14	2.03	0.84	109	4.5	3.77
452	0	82	123	0	0	0	0	0	1	1	28	0	81	113.339	0	84	140	0	11.8	0	4.27	0.431	14.3	10.74	2.43	1.044	0.057	0.029	228	4.41975	93.8272	79.1	43.1	0	3.33	3.53	1.26	0.72	587	7	3.34
453	0	54	81	0	0	0	0	0	0	1	70	1	83	81.9296	0	57	129	0	13	0	4.26	0.393	6.7	4.616	1.34	0.536	0.154	0.054	172	3.44478	128.358	71.5	41.6	0	3.9	0.8	1.86	1.86	406	4.6	3.65
454	0	80	120	1	0	0	0	0	0	1	36	0	86	99.6606	0	94	152	0	12.8	0	5.22	0.464	8.4	5.208	2.26	0.748	0.143	0.042	171	2.30442	75.6637	77.5	48.2	0	5.09	3.25	2.92	0.81	377	15.8	4.14
455	0	63	94.5	0	0	0	0	1	1	1	62	0	57	104.615	0	53	141	0	12.8	0	4.6	0.424	6.6	4.231	1.69	0.561	0.099	0.02	260	2.50355	153.846	72.6	42.8	0	6.37	2.18	4.29	1.14	389	6	4.08
456	0	72	108	1	1	0	0	1	0	1	37	0	124	63.582	0	118	138	0	12.3	0	4.55	0.425	9.1	4.377	3.513	0.855	0.282	0.073	414	1.24594	117.848	71.5	39.4	0	6.22	2.41	4.51	0.55	457	5.9	3.61
457	0	55	82.5	1	1	0	0	0	0	1	66	1	84	83.0531	0	86	102	1	13.8	0	3.7	0.327	7.2	4.349	2.196	0.403	0.194	0.058	183	1.98042	83.3333	62.5	36.4	0	4.6	1.89	3.06	0.79	264	7.3	3.97
458	0	50	75	0	1	1	0	0	0	0	72	1	54	90.8178	0	62	138	0	13.9	0	4.69	0.43	7.2	4.716	1.627	0.677	0.158	0.022	211	2.89859	129.687	71.6	39.3	0	4.43	1.51	2.6	1.23	248	5.7	3.76
459	0	80	120	0	1	0	0	1	0	1	38	0	203	34.7911	1	191	149	0	12.7	0	5.13	0.44	11.4	7.741	2.337	0.844	0.41	0.068	352	3.31237	150.62	68.6	37.7	0	5.93	1.98	4.31	1.02	390	6.8	3.34
460	0	65	97.5	0	0	1	0	1	0	1	81	1	88	70.6592	0	103	111	1	13.9	0	3.5	0.34	5.8	3.909	1.003	0.574	0.284	0.029	173	3.89731	172.483	67	34.2	1	3.84	0.58	2.66	0.74	286	6.5	4.55
461	0	59	88.5	0	0	0	0	0	0	1	20	0	68	130.686	0	72	136	0	13.5	0	4.47	0.411	5.9	3.522	1.917	0.384	0.059	0.018	254	1.83725	132.499	75.9	46.6	0	5.96	1.79	4.04	1.02	484	9.4	3.69
462	0	67	100.5	0	0	0	0	0	0	1	37	0	60	122.097	0	65	132	0	12.3	0	4.41	0.405	5.7	3.084	1.984	0.456	0.148	0.029	257	1.55444	129.536	72.5	39.4	0	5.3	1.11	3.36	0.85	343	5.3	4.07
463	0	67	100.5	0	0	0	0	0	0	0	65	0	65	85.948	0	59	125	0	13	0	3.84	0.376	8.4	5.611	2.1	0.63	0.042	0.017	188	2.6719	89.5238	76.1	42.2	0	4.09	0.6	1.95	1.89	351	5.1	3.23
464	0	50	75	0	0	0	0	0	0	0	45	0	50	112.6	0	43	113	1	13.7	0	3.83	0.352	12	6.336	3.132	2.448	0.06	0.024	216	2.02299	68.9655	73.9	44	0	5.87	0.44	3.6	2.2	170	6.3	3.65
465	0	75	112.5	0	0	0	0	0	0	1	28	0	94	94.6731	0	77	142	0	12	0	4.63	0.436	7.5	3.195	3.3	0.743	0.233	0.03	202	0.968182	61.2121	81.2	46.4	0	4.97	1.8	2.81	0.83	474	5.2	3.93
466	0	72	108	0	0	0	0	1	1	1	75	1	120	50.655	1	103	155	0	13.3	0	5.25	0.495	9	5.139	2.385	1.062	0.351	0.063	369	2.15472	154.717	68.8	42	0	5.48	1.94	3.76	0.94	323	5.6	4.92
467	0	65	97.5	0	0	0	0	0	0	1	37	0	85	100.372	0	100	174	0	12.7	0	5.77	0.528	12.3	9.467	2.156	0.652	0	0.025	197	4.391	91.3729	74.7	49.8	0						5.6	3.46
468	0	65.8	98.7	1	0	0	0	1	0	1	50	0	67	106.5	0	67	133	0	15.8	1	6.61	0.442	10.2	7.834	1.683	0.643	0.02	0.02	271	4.65478	161.022	63	35.5	0	4.66	1.78	2.96	1.05	209	11.6	4.55
469	0	56	84	0	0	0	0	0	0	0	40	0	67	98.7626	0	67	125	0	12.2	0	3.88	0.378	5.9	2.714	2.537	0.519	0.1	0.029	242	1.06977	95.3883	64	39.1	0	4.5	0.7	3.2	0.89	170	4.5	4.2
470	0	66	99	1	1	0	1	0	0	0	54	0	50	105.701	0	47	135	0	12	0	4.31	0.424	7.3	4.3	2.234	0.679	0.058	0.029	357	1.9248	159.803	76.1	40	0	8.15	1.72	6.06	1.56	336	8	4.26
471	0	50	75	0	0	0	0	0	0	1	67	1	80	87.8687	0	87	163	0	12.7	0	5.1	0.48	7.5	4.702	1.845	0.818	0.128	0.007	148	2.54851	80.2168	71.2	47.5	0	4.02	1.32	2.51	1	384	5.5	4.24
472	0	47	70.5	0	0	0	0	0	0	1	56	0	113	62.2508	0	97	135	0	13.8	0	5.62	0.459	9.4	4.051	4.333	0.808	0.169	0.038	297	0.934918	68.5437	82.9	52.1	0	7.5	1.66	4.1	2.56	425	4.8	4.53
473	0	73	109.5	0	1	0	1	0	0	1	60	0	89	80.7796	0	86	141	0	13.8	0	5.01	0.436	5	2.515	1.855	0.44	0.16	0.03	163	1.3558	87.8706	64.9	39.1	0	4.45	1.5	2.63	0.87	444	6.5	4.34
474	0	51.5	77.25	0	1	0	1	1	0	0	44	0	94	63.7679	0	101	125	0	14.1	0	4.77	0.402	9.4	6.364	2.228	0.686	0.094	0.028	289	2.85637	129.713	78.1	43.1	0	4.85	0.58	3	1.04	269	6.7	3.3
475	0	65	97.5	0	1	0	0	1	0	1	68	1	89	76.3652	0	79	127	0	14.3	0	4.69	0.407	12.9	8.482	2.961	1.213	0.206	0.039	257	2.86457	86.795	56.2	37.7	0	5.76	2.5	3.3	1.25	500	4.5	3.96
476	0	65.9	98.85	0	1	0	0	1	1	1	75	1	129	46.4141	1	105	150	0	13.9	0	5.53	0.492	12.1	6.885	3.582	0.968	0.593	0.073	247	1.92211	68.9559	68.7	37.6	0	6.44	1.65	4.17	1.53	504	4.94	4.26
477	0	59.8	89.7	0	1	1	0	1	1	1	82	1	117	49.7234	1	102	116	1	12.7	0	3.65	0.368	6.5	4.108	1.456	0.819	0.098	0.02	129	2.82143	88.5989	64.1	35.4	0	4.08	1.1	2.49	0.87	513	5.1	3.77
478	0	55.2	82.8	0	0	0	0	0	1	1	77	1	82	79.1499	0	77	133	0	14	0	4.29	0.412	8.1	5.454	1.666	0.883	0.057	0.041	317	3.27371	190.276	72.4	37	0	5.6	0.67	3.56	1.75	334	5.8	3.07
479	0	49	73.5	0	0	0	0	0	0	0	30	0	49	125.946	0	56	133	0	13	0	4.66	0.426	5.3	2.708	2.019	0.371	0.17	0.032	160	1.34126	79.2472	76.7	47.4	0	4.2	0.78	2.04	1.87	304	4.7	3.53
480	0	90	135	0	0	0	0	0	0	1	52	0	100	74.2198	0		148	0	12.8	0	4.61	0.446	7.6	5.205	1.835	0.373	0.164	0.023	242	2.83651	131.88	67.3	34.6	1	3.49	0.99	1.84	0.95	620	4	3.73
481	0	46	69	0	0	0	0	0	0	0	64	0	116	42.9704	1	92	109	1	12.8	0	3.75	0.344	5.3	3.721	0.811	0.689	0.048	0.032	385	4.58816	474.723	74.3	32.8	1	3.83	1.21	2.31	0.12	244	6.1	3.97
482	0	45	67.5	1	1	0	0	0	1	1	67	1	80	87.8687	0	112	95	1	13.5	0	3.4	0.301	10.1	7.191	1.606	1.03	0.222	0.051	383	4.47758	238.481	71.2	30.5	1	3.42	1.38	1.91	0.97	251	5.4	4.65
483	0	35	52.5	0	1	0	0	0	0	0	82	1	64	77.7166	0	52	113	1	14.9	0	3.73	0.335	13.9	9.714	3.808	0.323	0.014	0.041	224	2.55095	58.8235	60.9	32.1	1	5.69	1.67	3.05	0.61	237	4.8	4.03
484	0	44	66	0	0	0	0	0	0	0	65	0	64	87.5742	0	49	101	1	12.4	0	3.56	0.297	14.2	9.997	2.215	1.899	0.057	0.043	313	4.51332	141.309	70.5	33	1	2.75	1.17	1.45	0.81	128	15.8	3.44
485	0	67	100.5	0	0	0	0	0	0	0	39	0	57	112.492	0	44	112	1	12.7	0	3.75	0.336	5.25	2.732	1.998	0.321	0.17	0.032	225	1.36737	112.613	63.8	37.4	0	4.6	0.6	3.03	1.18	259	5.4	4.15
486	0	48.5	72.75	0	0	0	0	0	0	0	37	0	51	118.335	0	54	125	0	13.1	0	4.37	0.397	5.4	2.888	1.972	0.459	0.059	0.022	206	1.4645	104.462	70.6	43.3	0	3.54	1.61	1.74	0.58	192	6.5	3.32
487	0	70	105	0	0	1	0	0	0	1	63	0	83	86.059	0	89	134	0	12.1	0	4.36	0.4	3.7	1.835	1.121	0.722	0.011	0.011	153	1.63693	136.485	66.9	39.7	0	4.67	2.51	2.42	0.51	178	7	4.48
488	0	68	102	0	1	0	0	0	1	1	64	0	143	44.27	1	76	143	0	12.6	0	4.66	0.433	7.6	4.241	1.619	1.383	0.327	0.03	182	2.61952	112.415	74.8	44.9	0	4.6	1.24	2.35	1.37	365	7.5	4.13
489	0	66	99	0	0	0	0	0	0	1	34	0	125	64.3086	0	104	162	0	12.8	0	5.81	0.499	7.2	3.766	1.757	1.346	0.259	0.072	215	2.14343	122.368	74.3	48.2	0	3.59	0.81	2.34	0.71	835	5.4	2.82
490	0	52.5	78.75	1	1	0	1	1	0	1	69	1	92	72.8514	0	97	143	0	12.2	0	4.69	0.443	12.4	9.5	1.5	1.4	0	0	222	6.33333	148	68	30.1	1	3.52	0.76	1.9	1.1	329	7	3.12
491	0	60	90	0	0	0	0	0	1	1	38	0	63	118.836	0	61	148	0	14.2	0	4.66	0.448	15.1	10.098	3.169	1.589	0.187	0.056	242	3.18649	76.3648	71	43.4	0	7.48	6.45	2.89	0.55	434	5.8	4.28
492	0	65	97.5	1	1	0	0	0	1	1	57	0	89	82.5	0	83	132	0	12.5	0	4	0.383	4	2.264	1.25	0.436	0.04	0.008	235	1.8112	188	70.7	41.3	0	4.76	0.8	2.83	1.15	403	4.5	3.63
493	0	55	82.5	0	0	0	0	0	0	1	76	1	94	67.5757	0	79	140	0	13.3	0	4.8	0.457	5.4	2.7	1.075	0.61	0.934	0.081	248	2.51163	230.698	62.7	36.9	0	4.51	0.72	2.94	1.16	273	4.1	4.21
494	0	59.8	89.7	0	1	0	0	0	1	1	72	1	135	44.8675	1	106	124	0	13.6	0	4.19	0.372	7.5	4.95	1.755	0.57	0.158	0.068	271	2.82051	154.416	66.7	33.5	1	4.79	0.65	3.22	1.14	321	6.6	4.1
495	0	63.7	95.55	0	1	0	0	1	0	1	67	1	76	89.7408	0	71	134	0	14	0	5.6	0.409	13.3	9.337	2.022	1.569	0.333	0.04	312	4.61771	154.303	67.6	39.5	0	4.59	1.29	3.06	0.95	436	9	3.84
496	0	65	97.5	0	1	0	1	1	1	1	71	1	123	50.5662	1	134	125	0	14.3	0	4.09	0.384	10.6	7.219	2.237	0.848	0.254	0.042	276	3.22709	123.38	67.3	33	1	3.09	1.34	1.7	0.88	199	5.4	4.35
497	0	72	108	0	0	0	0	1	0	1	60	0	85	85.3978	0	94	132	0	14.4	0	5.08	0.441	5.9	2.643	2.142	0.944	0.142	0.029	112	1.23389	52.2876	69.2	38	0	4.94	2.04	3.1	0.99	266	4.3	4.29
498	0	63	94.5	1	1	1	0	1	0	1	76	1	170	33.0133	1	126	100	1	12.5	0	3.29	0.32	9.6	6.47	1.843	1.037	0.221	0.029	194	3.51058	105.263	67.8	38.6	0	3.97	1.31	2.59	0.61	400	5.8	4.58
499	0	60	90	0	1	0	0	1	0	1	72	1	82	81.9793	0	99	145	0	13.2	0	4.56	0.448	7.8	3.268	3.705	0.616	0.133	0.078	252	0.882051	68.0162	73	37.6	0	4.33	1.32	2.46	1.46	338	4.5	4.25
500	0	67	100.5	0	1	1	1	1	0	0	52	0	74	80.502	0	61	132	0	13.7	0	4.55	0.395	12.5	8.813	2.813	0.825	0.025	0.025	290	3.13295	103.093	74.3	38.9	0	3.98	2.64	2.31	0.79	412	6.3	3.99
501	0	64.4	96.6	0	1	0	0	1	0	1	85	1	112	51.3264	1	102	133	0	13.8	0	5.12	0.42	8.8	6.961	1.294	0.493	0.044	0.009	161	5.37944	124.42	72.3	43.7	0	4.07	1.96	2.3	0.71	615	7.1	2.71
502	0	88	132	0	0	0	0	0	0	1	39	0	84	100.398	0	89	148	0	12.2	0	4.93	0.435	4.8	1.872	2.246	0.49	0.072	0.12	149	0.833482	66.3402	62.6	39.2	0	3.65	1.24	2.13	0.59	380	5	3.8
503	0	85	127.5	0	1	0	0	0	0	1	61	0	84	86.022	0	90	143	0	13.7	0	4.72	0.433	8.3	5.403	1.751	0.913	0.191	0.042	210	3.08567	119.931	63	35.6	0	3.62	1.27	2.27	0.99	321	6.1	3.09
504	0	50	75	0	0	0	0	0	0	1	70	1	109	58.9329	1	78	106	1	13.9	0	3.7	0.34	9.8	6.811	1.852	1.098	0.029	0.01	278	3.67765	150.108	71.7	34.9	1	4.24	0.61	2.14	1	372	6.5	4.38
505	0	47	70.5	0	1	0	0	0	0	1	78	1	207	25.6562	1	155	116	1	13.7	0	3.93	0.363	13.7	9.015	2.411	2.041	0.164	0.069	389	3.73911	161.344	82.2	37.5	0	2.85	0.96	1.65	0.97	458	6.6	4.87
506	0	45	67.5	1	0	0	0	0	1	1	74	1	72	87.3545	0	72	122	0	14.9	0	5.25	0.387	6.9	3.726	1.904	1.007	0.235	0.028	105	1.95693	55.1471	57.5	34.9	1	4.24	0.58	2.17	1.95	193	4.6	4.22
507	0	48	72	0	0	0	0	0	0	0	35	0	47	123.278	0	59	120	0	12.8	0	4.12	0.379	5.5	3.641	1.21	0.473	0.148	0.028	259	3.00909	214.05	67.4	36.9	0	4.07	0.71	2.19	1.51	225	6.5	3.53
508	0	51	76.5	0	0	0	0	0	1	1	63	0	80	90.3727	0	89	124	0	13.4	0	3.71	0.362	8.6	6.052	1.86	0.611	0.069	0.069	179	3.25376	96.2366	68.3	30.5	1	3.67	1.63	1.79	0.96	281	6.5	4.53
509	0	63.5	95.25	0	0	0	0	0	0	0	64	0	49	99.1882	0	48	103	1	14.8	0	4.82	0.362	5.8	2.836	2.39	0.499	0.058	0.017	415	1.18661	173.64	86.8	41.5	0	3.9	0.95	2.45	1.02	292	5.8	3.8
510	0	61.5	92.25	0	0	1	0	0	0	1	53	0	70	102.419	0	67	147	0	12.4	0	4.84	0.431	6	4.47	1.134	0.36	0.018	0.018	181	3.9418	159.612	77.3	44.5	0	5.39	0.85	3.28	1.36	501	5.7	4.24
511	0	40	60	1	0	0	0	0	0	0	59	0	43	107.245	0	46	117	1	13.8	0	4.33	0.364	12.5	8.512	2.55	0.925	0.475	0.037	585	3.33804	229.412	65.1	36	0	6.36	2.05	4.1	0.59	146	9.7	4.16
512	0	62	93	0	1	0	1	1	0	0	49	0	66	94.4129	0	67	112	1	12.9	0	3.85	0.353	6	3.282	2.202	0.408	0.078	0.03	244	1.49046	110.808	64	41.8	0	4.27	1.8	2.55	0.89	311	4.9	2.83
513	0	60	90	1	1	0	0	0	0	0	61	0	67	85.2171	0	86	102	1	14.2	0	3.64	0.329	4	2.084	1.232	0.536	0.1	0.048	294	1.69156	238.636	66.8	34.8	1	3.23	1.83	1.63	0.48	288	6.7	3.37
514	0	63	94.5	0	0	0	0	0	0	0	43	0	71	90.1557	0	66	130	0	12.1	0	4.38	0.411	6.5	4.245	1.625	0.546	0.071	0.013	201	2.61231	123.692	81.4	42.7	0	5.26	0.65	3.14	1.86	295	5.3	4.14
515	0	73	109.5	1	0	0	0	0	0	0	47	0	54	108.253	0	54	116	1	14.6	0	5.43	0.374	7.2	4.01	2.599	0.439	0.101	0.05	327	1.5429	125.818	71	39.5	0	6.03	1.92	3.79	1.61	302	8.8	4.65
516	0	47	70.5	0	0	0	0	0	0	0	52	0	44	111.801	0	64	127	0	13.5	0	4.27	0.407	6.52	3.998	1.602	0.689	0.189	0.039	410	2.49563	255.93	74.5	43.6	0	4.49	0.92	2.69	1.29	214	4.8	4.4
517	0	48	72	0	0	0	0	0	1	1	83	1	98	61.1722	0	100	147	0	12	0	4.37	0.443	7.5	3.27	3.397	0.487	0.307	0.037	197	0.962614	57.9923	69.5	37.2	0	3.18	1.26	2.01	0.93	401	5	4.23
518	0	60	90	0	1	0	0	0	0	1	60	0	124	54.0963	1	118	151	0	14.2	0	4.83	0.475	7	4.606	1.498	0.714	0.161	0.021	187	3.07477	124.833	70.9	44.3	0	6.08	0.92	4.05	1.76	336	5.3	4.22
519	0	73	109.5	1	0	1	0	1	0	1	45	0	81	100.581	0	70	150	0	12	0	4.56	0.444	8.3	5.669	1.585	0.78	0.232	0.033	182	3.57666	114.826	78	47.3	0	7.22	3.74	4.47	1.04	474	17.5	4.06
520	0	85	127.5	0	1	0	0	0	1	1	55	0	77	97.1104	0	86	137	0	12.8	0	4.68	0.406	11.1	7.802	2.165	0.921	0.144	0.067	212	3.6037	97.9215	61.2	39.2	0	3.25	0.7	1.65	1.14	200	8.1	3.43
521	0	85	127.5	0	0	0	0	0	1	1	39	0	83	101.863	0	79	152	0	12.6	0	4.96	0.469	14.2	9.721	2.889	1.562	0.014	0.014	235	3.36483	81.343	68.2	37.4	0	5.36	3.41	3.28	0.64	274	13.4	4.19
522	0	51	76.5	0	0	0	0	0	0	1	55	0	64	104.779	0	63	116	1	12.9	0	4.25	0.356	13.3	9.239	3.011	1.037	0	0.013	207	3.06842	68.7479	56.4	33.5	1	3.03	0.71	1.25	1.29	241	19.7	3.19
523	0	50	75	0	0	0	0	0	0	1	67	1	121	53.0483	1	74	116	1	15	0	3.78	0.369	4.4	3.058	0.836	0.304	0.185	0.013	159	3.65789	190.191	66.7	34.7	1	3.36	1.09	1.55	1.29	405	5.9	4.1
524	0	53.8	80.7	0	1	0	0	0	1	1	60	0	53	109.316	0	51	114	1	11.6	0	3.11	0.345	9.6	6.622	1.902	0.95	0.086	0.038	240	3.4816	126.183	61.1	38.9	0	4.94	1.11	2.98	1.19	52	8.4	3.61
525	0	57.8	86.7	0	1	0	0	0	0	1	60	0	69	98.0827	0	49	133	0	12	0	4.24	0.382	10.2	7.007	2.632	0.561	0	0	153	2.66223	58.1307	81.4	49.7	0	5.17	0.59	2.74	1.9	282	10.2	3.48
526	0	58	87	0	0	0	0	0	1	1	62	0	83	86.6657	0	75	160	0	11.9	0	4.78	0.496	10.9	8.232	1.883	0.698	0.033	0.054	208	4.37175	110.462	73.7	44.6	0	3.88	0.52	1.63	2.27	414	5.9	4.14
527	0	51	76.5	1	1	0	1	1	0	0	69	1	47	97.0869	0	46	129	0	12.4	0	4.24	0.39	10.6	6.467	2.902	1.072	0.114	0.046	349	2.22846	120.262	68.1	37.4	0	6.33	2.79	4.38	0.83	277	9.3	3.8
528	0	63.1	94.65	0	1	0	0	1	0	0	73	1	159	27.552	1	136	127	0	14.1	0	4.17	0.398	5.9	3.915	1.596	0.36	0.018	0.012	172	2.45301	107.769	65.7	37.4	0	6.22	1.49	3.79	1.53	431	6.7	3.88
529	0	68.8	103.2	0	1	0	1	1	1	1	51	0	78	99.3494	0	90	154	0	13	0	5.49	0.457	10.4	6.843	2.163	0.811	0.53	0.052	243	3.16366	112.344	75.3	51.6	0	5.38	3.51	2.39	0.97	338	12.5	4.26
530	0	50	75	0	1	0	0	1	1	1	68	1	68	93.2808	0	59	143	0	12.4	0	4.46	0.424	9.2	6.238	1.444	1.122	0.377	0.018	274	4.31994	189.751	69.4	40	0	4.06	0.65	2.37	1.07	325	7.5	4.04
531	0	65	97.5	0	0	0	0	0	0	1	55	0	80	95.5968	0	96	150	0	13.3	0	5.01	0.45	14.9	9.938	3.8	0.969	0.149	0.045	262	2.61526	68.9474	69.2	40.7	0	5.04	1.23	3.56	0.82	447	4.1	3.87
532	0	40	60	0	1	0	1	1	0	0	77	1	55	87.1556	0	57	86	1	12.8	0	3.02	0.27	11.3	8.3	2.164	0.735	0.068	0.034	374	3.83549	172.828	75.6	31.3	1	3	0.95	1.66	0.53	137	8.4	3.05
533	0	60	90	0	1	0	1	1	1	1	52	0	98	76.055	0	113	131	0	12.7	0	4.2	0.396	7.7	4.381	2.056	0.855	0.37	0.038	206	2.13084	100.195	70.8	41.3	0	3.43	3.69	1.84	0.57	539	5.1	3.08
534	0	53	79.5	1	1	0	0	0	0	1	72	1	118	52.7958	1	84	149	0	13.6	0	5.14	0.475	13.1	10.925	1.284	0.891	0	0	228	8.50857	177.57	73.6	29.5	1	3.68	0.94	2.16	0.81	612	13.3	3.86
535	0	67	100.5	0	1	0	0	1	0	1	66	1	107	61.9847	0	109	82	1	13.4	0	2.74	0.248	12.1	6.945	3.606	1.234	0.278	0.036	183	1.92596	50.7488	55.4	30.2	1	2.28	1.06	1.11	0.7	308	6.6	3.62
536	0	53	79.5	0	0	0	0	0	0	0	21	0	65	117.076	0	70	126	0	13.1	0	4.29	0.384	14.1	11.238	2.748	1.1	0	0.014	210	4.08952	76.4192	71	42.8	0	4.14	0.31	2.19	1.55	302	4.9	3.93
537	0	85	127.5	0	1	0	0	1	0	1	61	0	84	86.022	0	86	143	0	13.7	0	4.72	0.433	8.3	5.403	1.751	0.913	0.191	0.042	210	3.08567	119.931	63	35.6	0	3.62	1.27	2.27	0.99	321	6.1	3.09
538	0	68	102	0	1	0	0	0	0	1	66	1	126	50.87	1	117	139	0	13	0	4.61	0.426	6	3.354	1.722	0.744	0.138	0.042	213	1.94774	123.693	62.9	39.8	0	4.78	0.78	2.94	0.92	452	5	4.53
539	0	56	84	0	1	0	1	1	1	1	66	1	96	70.6714	0	90	152	0	12.8	0	5.21	0.464	13.7	9.316	3.192	0.726	0.397	0.069	348	2.91855	109.023	89	47.3	0	6.75	1.32	4.64	1.26	367	5.6	5.11
540	0	62	93	0	0	0	0	1	0	0	44	0	73	86.5678	0	74	137	0	12.7	0	4.38	0.409	7	4.34	1.981	0.574	0.077	0.028	271	2.19081	136.8	76.4	46.9	0	6.65	1.83	4.61	1.2	258	5.6	4.34
541	0	58	87	1	0	0	0	0	1	1	61	0	100	69.6728	0	118	124	0	14.4	0	5.48	0.404	7.4	4.114	2.324	0.747	0.192	0.022	242	1.77022	104.131	68.7	29.1	1	5.62	1.84	3.06	0.8	184	9.7	5.1
542	0	60	90	0	0	0	0	0	0	0	46	0	55	108.36	0	67	133	0	12.8	0	4.62	0.406	7.6	4.337	2.666	0.487	0.087	0.041	165	1.62678	61.8905	72.1	43.7	0	4.18	0.91	2.28	1.61	193	4.9	3.98
543	0	52	78	0	1	1	1	1	0	0	46	0	194	26.1854	1	78	137	0	13.4	0	4.87	0.414	7.6	4.7456	1.958	0.882	0.008	0.008	245	2.4237	125.128	75.3	42	0	3.38	1.05	1.55	1.12	468	6.3	4.05
544	0	65	97.5	0	0	0	0	0	0	0	54	0	49	106.406	0	46	143	0	12.7	0	4.92	0.425	10	4.63	3.63	0.9	0.74	0.1	279	1.27548	76.8595	75.1	43	0	5.71	1.9	3.07	1.27	395	8.6	4.15
545	0	55	82.5	0	0	0	0	0	0	0	55	0	115	46.2564	1	78	134	0	12.8	0	4.65	0.422	6.8	4.379	1.822	0.292	0.279	0.027	166	2.4034	91.1087	72.3	45.4	0	5.26	1.66	3.49	1	399	5.3	3.47
546	0	60.4	90.6	0	1	0	1	0	0	0	79	1	62	82.6183	0	56	139	0	12.5	0	4.83	0.438	5.1	2.183	2.509	0.367	0.02	0.02	112	0.870068	44.6393	67.6	33.3	1	3.69	2.54	1.84	0.71	375	5.8	3.41
547	0	82	123	0	0	0	0	0	0	1	55	0	110	64.7626	0	95	146	0	13	0	4.33	0.454	7.7	4.173	2.349	0.708	0.447	0.023	156	1.7765	66.4112	68	37.8	0	7.26	1.48	4.64	1.05	389	5.6	4.29
548	0	64.8	97.2	0	0	0	0	0	0	1	44	0	72	107.847	0	70	140	0	13.4	0	4.52	0.41	13.3	12.183	0.785	0.306	0	0.027	212	15.5197	270.064	72.9	43	0	4.49	1.15	2.56	0.86	294	7	3.57
549	0	63.6	95.4	1	0	0	0	1	1	1	68	1	80	87.2536	0	96	129	0	15.8	1	5.36	0.403	15.5	12.043	2.434	0.946	0.046	0.031	331	4.94782	135.99	65.6	40	0	5.39	1.49	3.63	1.03	365	8.2	4.22
550	0	70	105	0	0	0	0	1	1	1	64	0	82	86.7182	0	89	149	0	13.7	0	4.57	0.453	10.1	6.504	2.22	0.949	0.364	0.061	263	2.92973	118.468	60.9	39.9	0	5.73	1.89	3.72	1.05	368	4.4	4
551	0	53.8	80.7	0	1	0	0	1	0	0	70	1	55	91.5484	0	48	117	1	14.7	0	4.61	0.378	9.2	5.732	2.116	0.994	0.322	0.037	327	2.70888	154.537	77.1	40.3	0	2.73	0.66	1.55	0.77	496	6.1	3.03
552	0	65	97.5	0	0	0	0	0	0	1	58	0	80	93.6033	0	67	142	0	14.1	0	5.25	0.441	5.4	2.965	1.739	0.567	0.097	0.032	203	1.705	116.734	75	44.8	0	4.87	1.01	3.36	1.2	421	5.7	4.53
553	0	53	79.5	0	1	0	0	1	0	1	80	1	70	84.7245	0	52	141	0	13.9	0	5	0.463	6	3.72	1.392	0.858	0.012	0.018	177	2.67241	127.155	73.5	40	0	3.81	0.49	2.19	1.02	269	8.3	4.1
554	0	48	72	1	1	0	1	1	0	0	72	1	77	66.6692	0	86	134	0	13.8	0	4.25	0.391	11.6	6.92	3.61	0.73	0.28	0.05	232	1.9169	64.2659	73.2	41.4	0	6.04	4.56	2.73	0.99	433	5.3	2.67
555	0	77	115.5	0	1	0	0	1	1	1	73	1	147	40.1946	1	115	133	0	13.5	0	4.64	0.4	11.1	6.638	2.93	1.165	0.333	0.033	171	2.26553	58.3618	60.1	34.6	1	3.75	2.04	2.07	0.55	401	5.8	3.73
556	0	55	82.5	0	1	0	0	1	1	1	75	1	89	72.701	0	77	118	1	13.1	0	4.33	0.389	14.4	12.096	1.238	1.008	0.029	0.029	215	9.7706	173.667	70.1	36.6	0	4.4	0.64	2.65	1.34	321	3.3	3.81
557	0	75	112.5	0	1	0	0	1	0	1	61	0	127	52.1873	1	63	142	0	13.2	0	4.9	0.433	11.8	7.269	3.469	0.802	0.224	0.035	235	2.09542	67.7429	74.3	37.9	0	5.11	2.04	3.84	0.68	644	6.1	4.61
558	0	76	114	1	1	0	0	1	0	1	69	1	96	69.1976	0	84	149	0	12.9	0	4.91	0.449	8.5	6.613	1.037	0.748	0.068	0.034	306	6.37705	295.082	72.6	36.5	0	5.25	1.07	3.32	1.51	329	6.6	3.81
559	0	73	109.5	1	1	0	0	1	0	1	69	1	105	62.0925	0	108	150	0	12.7	0	5.03	0.443	8.6	5.805	1.307	1.247	0.181	0.06	209	4.44147	159.908	76.3	40.2	0	5.86	3.75	3.25	1.11	407	17.7	4.18
560	0	67.5	101.25	1	1	0	0	1	0	0	61	0	71	79.4474	0	87	127	0	12.5	0	4.1	0.37	5.4	2.954	1.658	0.416	0.335	0.038	206	1.78166	124.246	70.1	34	1	4.68	1.45	2.98	0.67	349	9.9	3.37
561	0	60	90	1	0	0	0	1	0	0	68	1	60	90.2235	0	56	131	0	12.3	0	4.05	0.402	8.2	3.928	3.067	0.812	0.377	0.016	202	1.28073	65.8624	73.6	35.3	0	6.64	1.96	4.56	0.89	297	10.8	3.74
562	0	71	106.5	0	0	0	0	0	0	1	50	0	76	101.124	0	83	136	0	12.5	0	4.62	0.4	6.4	3.078	2.208	0.672	0.41	0.032	241	1.39402	109.149	71.3	41.4	0	4.38	2.8	2.38	1.06	375	5	4.18
563	0	54	81	0	0	0	0	0	0	0	44	0	72	88.0235	0	60	148	0	12.4	0	4.74	0.441	6.4	4	1.869	0.454	0.058	0.019	228	2.14018	121.99	69.8	43.1	0	5.08	1.19	3.63	0.89	284	6	4.37
564	0	47	70.5	1	1	0	0	0	0	0	69	1	68	79.1301	0	48	123	0	13.2	0	3.95	0.376	7.7	4.968	1.901	0.732	0.092	0.008	308	2.61336	162.02	66.9	41.8	0	4.41	0.7	2.32	1.05	286	5	3.87
565	0	62	93	0	0	0	0	0	0	1	60	0	77	93.7588	0	78	136	0	12.7	0	4.17	0.402	5.8	3.016	1.902	0.621	0.232	0.029	225	1.5857	118.297	71.1	38.9	0	4.7	0.41	3.08	0.9	300	5.1	4.16
566	0	55	82.5	1	1	0	0	1	1	1	72	1	128	47.8507	1	147	111	1	13.4	0	3.81	0.349	14.7	13.142	0.764	0.764	0.015	0.015	379	17.2016	496.073	54.9	27.3	1	4.71	2.56	2.89	0.85	452	3.9	3.43
567	0	60	90	0	1	0	1	1	0	0	43	0	180	29.2779	1	149	138	0	17	1	5.08	0.447	8.3	5.304	1.934	0.739	0.315	0.008	341	2.7425	176.319	79.1	42.4	0	3.21	1.97	1.55	0.99	867	4.4	2.82
568	0	51	76.5	0	0	0	0	0	0	0	54	0	54	103.059	0	50	114	1	13.2	0	4.16	0.376	14.6	11.578	1.737	1.226	0.044	0.015	179	6.66552	103.051	64.7	31.5	1	5.95	1.03	3.46	1.61	253	7.2	3.94
569	0	69	103.5	0	0	0	0	1	0	1	52	0	101	73.3323	0	71	130	0	11.9	0	4.17	0.405	6.9	4.147	2.035	0.538	0.172	0.014	199	2.03784	97.7887	69.6	40.8	0	3.94	2.04	2.03	0.98	428	5.1	3.37
570	0	61.5	92.25	0	0	0	0	0	0	0	59	0	64	91.3442	0	72	117	1	12.4	0	4.13	0.384	4.8	2.237	1.982	0.494	0.067	0.019	155	1.12866	78.2038	73.5	44	0	3.83	1.47	2.28	1.1	354	6.1	4.06
571	0	59	88.5	0	0	0	0	0	0	1	44	0	123	61.1267	0	108	146	0	12.5	0	5.22	0.456	16.4	14.498	1.214	0.623	0.016	0.049	446	11.9423	367.381	79.2	48.4	0	5.33	1.31	3.71	0.78	539	6.6	3.81
572	0	50	75	0	0	0	0	0	0	0	64	0	55	95.4894	0	58	125	0	13.6	0	4.66	0.428	7.2	4.334	2.167	0.418	0.238	0.043	236	2	108.906	73.5	40.9	0	5	2.6	3.23	1.07	394	6	4.03
573	0	63.5	95.25	0	0	0	0	0	0	1	46	0	88	90.3535	0	52	107	1	13.2	0	3.8	0.342	14.5	11.455	1.885	1.131	0.015	0.015	130	6.07692	68.9655	53.9	33.4	1	3.33	2.14	1.62	1.03	712	7.2	4.31
574	0	58.1	87.15	0	0	0	0	0	1	1	23	0	81	117.391	0	65	116	1	12	0	4	0.337	8.1	5.427	1.968	0.689	0.008	0.008	174	2.75762	88.4146	66.2	43.8	0	3.23	0.67	1.61	1.47	251	5.9	3.17
575	0	50	75	0	0	0	0	0	0	0	64	0	44	102.763	0	23	98	1	13.6	0	3.4	0.31	9.8	8.585	0.559	0.568	0.069	0.02	131	15.3578	234.347	64.5	31.4	1	3.65	2.3	0.99	0.66	192	8.2	3.38
576	0	55	82.5	0	1	0	0	1	0	0	76	1	57	86.7446	0	49	133	0	13.2	0	4.81	0.424	4.7	2.858	1.41	0.404	0.009	0.019	255	2.02695	180.851	79.7	38	0	5.34	0.88	3.43	1.24	267	5.4	3.4
577	0	77	115.5	0	0	0	0	0	0	1	59	0	97	73.3091	0	80	153	0	12.4	0	4.79	0.468	5.9	3.151	2.018	0.531	0.171	0.029	133	1.56145	65.9068	82.5	39.6	0	4.1	0.82	2.79	0.81	371	6	3.46
578	0	75	112.5	0	0	0	0	0	1	1	50	0	73	102.811	0	65	107	1	13.4	0	4.62	0.352	4.2	2.155	1.638	0.37	0.008	0.029	149	1.31563	90.9646	61.1	35.7	0	2.59	0.81	1.5	0.7	249	5.9	3.87
579	0	59	88.5	0	1	0	0	0	0	0	55	0	57	100.533	0	67	130	0	13.2	0	4.89	0.409	11.1	8.047	2.187	0.777	0.067	0.022	268	3.67947	122.542	76.4	47.2	0	5.56	1.44	3.59	1.19	251	5.9	3.28
580	0	71	106.5	0	1	0	0	1	0	1	51	0	71	103.264	0	83	134	0	13.9	0	4.24	0.408	9.9	5.237	3.584	0.703	0.356	0.02	143	1.46122	39.8996	62.3	34	1	5.31	0.83	3.51	1.45	442	5.3	3.48
581	0	62	93	0	0	0	0	0	0	0	78	1	67	75.6247	0	65	129	0	14.6	0	4.44	0.421	10.8	7.7	1.48	1.091	0.475	0.054	338	5.2027	228.378	85.3	44.2	0	6.78	0.91	4.35	1.57	180	7.5	3.62
582	0	62	93	0	0	0	0	0	0	0	64	0	87	60.8443	0	75	121	0	13.6	0	4.11	0.377	7.9	4.013	3.097	0.506	0.245	0.04	228	1.29577	73.6196	64.2	35.5	0	3.58	1.14	1.74	1.06	283	5.1	3.47
583	0	53.6	80.4	0	1	0	0	1	0	1	74	1	85	77.3991	0	87	118	1	13.8	0	4.26	0.36	6.2	3.305	1.829	0.496	0.508	0.062	247	1.807	135.046	62.3	34.3	1	2.95	0.77	1.47	1.04	297	4.7	3.24
584	0	51	76.5	1	0	0	0	0	0	1	83	1	64	86.0701	0	61	104	1	13.5	0	4.09	0.347	7.3	6.847	0.263	0.182	0	0.007	377	26.0342	1433.46	61.4	23.5	1	3.5	1.46	1.82	0.56	202	15.8	3.28
585	0	58.2	87.3	0	1	1	1	1	0	0	61	0	69	82.2399	0	71	109	1	14.5	0	3.91	0.334	10.6	6.932	1.505	0.71	1.378	0.074	278	4.60598	184.718	68.5	27.8	1	3.24	1.23	1.97	0.44	355	10.5	2.92
586	0	64	96	0	1	0	0	0	0	1	53	0	136	50.8184	1	139	118	1	15	0	5.61	0.393	11.2	8.355	1.568	0.963	0.28	0.034	255	5.32844	162.628	72.3	38.5	0	6.52	1.31	4.08	1.7	516	5.1	1.87
587	0	55	82.5	0	1	0	1	1	1	1	68	1	150	40.6269	1	136	110	1	11.5	0	3.81	0.346	12.2	9.504	1.244	1.318	0.11	0.024	231	7.63987	185.691	73.1	40.2	0	4.52	1.21	2.46	0.94	457	6.5	3.9
588	0	76	114	1	1	1	0	1	0	1	81	1	181	29.5471	1	134	124	0	13.2	0	4.05	0.399	8.3	5.519	1.56	0.913	0.224	0.083	163	3.53782	104.487	70.3	38.5	0	4.23	1.65	2.58	0.74	452	7.7	4.72
589	0	85	127.5	1	0	1	1	0	1	0	47	0	272	17.281	1	291	117	1	14.5	0	4.05	0.385	6.4	2.816	2.701	0.557	0.269	0.058	210	1.04258	77.749	76.8	44.2	0	9.63	7.49	5.82	0.82	555	9.1	4.39
590	0	74	111	1	1	0	0	1	0	0	34	0	32	140.884	0	52	141	0	12.6	0	5.06	0.442	7.5	3.607	3.067	0.555	0.233	0.037	256	1.17607	83.4692	75.4	43.2	0	6.18	5.26	3.94	0.67	490	11.7	3.26
591	0	50	75	1	0	0	0	0	0	0	47	0	52	109.605	0	49	119	1	13.1	0	4.08	0.389	13.9	12.149	0.806	0.917	0.014	0.014	165	15.0732	204.715	79.7	41.1	0	5.57	0.78	2.84	2.02	268	17.4	3.67
592	0	60.7	91.05	0	1	0	0	0	1	1	87	1	125	44.3179	1	117	134	0	14.1	0	4.08	0.404	8	6.4	0.8	0.8	0	0	153	8	191.25	75	44.9	0	4.75	1.11	3.32	0.86	125	7	2.28
593	0	64	96	0	1	0	1	1	0	1	75	1	129	46.4141	1	112	111	1	13.9	0	2.88	0.329	7.3	5.803	1.08	0.358	0.029	0.029	196	5.37315	181.481	66.2	33.9	1	2.76	0.38	1.53	0.87	571	4.9	3.75
594	0	72.5	108.75	1	1	0	0	0	1	1	42	0	75	107.553	0	84	162	0	13.3	0	5.19	0.429	14.8	12.624	1.184	0.962	0.015	0.015	155	10.6622	130.912	69.3	40.4	0	8.77	10.67	2.52	1.13	332	13.3	3.21
595	0	75.5	113.25	1	1	1	0	1	0	1	71	1	84	80.1867	0	100	132	0	15.3	1	4.56	0.428	7.8	5.312	1.521	0.757	0.179	0.031	187	3.49244	122.945	58.5	34.7	1	5.53	0.64	3.73	1.03	337	9	3.81
596	0	49	73.5	0	0	0	0	0	0	1	35	0	144	53.8174	1	91	172	0	12.9	0	5.69	0.509	8	5.28	1.624	1.024	0.048	0.024	296	3.25123	182.266	88.7	52.4	0	4.96	0.98	2.63	1.6	613	7.4	2.89
597	0	57.8	86.7	0	1	0	1	1	0	1	78	1	57	93.4935	0	66	158	0	14.5	0	5.31	0.479	14.8	11.5	1.5	1.8	0	0	356	7.66667	237.333	74.5	43.1	0	4.73	0.8	2.51	1.28	184	7.4	3.36
598	0	52	78	0	1	0	0	1	1	1	53	0	81	95.0848	0	93	112	1	13.8	0	3.96	0.365	11.3	6.351	3.04	1.435	0.429	0.045	167	2.08914	54.9342	53.3	28	1	3.93	0.71	2.72	0.73	433	4.9	3.85
599	0	38	57	0	1	1	0	1	1	1	88	1	149	35.5886	1	157	132	0	14	0	4.63	0.409	5.6	3.41	1.518	0.571	0.073	0.028	110	2.24638	72.4638	58.1	32.2	1	2.8	0.45	1.13	1.44	546	3.8	3.75
600	0	50	75	0	0	0	0	0	1	1	79	1	64	88.5228	0	49	128	0	12.8	0	3.93	0.423	3.7	2.549	0.655	0.403	0.041	0.052	133	3.8916	203.053	48.5	29.5	1	4.96	0.82	3.07	1.56	468	5.6	3.86
601	0	75	112.5	0	1	0	1	1	1	1	66	1	120	53.9609	1	136	145	0	14.7	0	5.31	0.455	11.3	9.063	1.537	0.588	0.079	0.034	219	5.89655	142.485	71.2	41.3	0	5.95	2.7	2.87	1.63	431	7.4	3.44
602	0	56.5	84.75	0	1	1	0	1	0	1	68	1	123	51.6431	1	128	142	0	13.3	0	4.86	0.464	6.5	3.926	1.625	0.799	0.117	0.033	223	2.416	137.231	66.8	36.4	0	4.22	0.72	2.73	0.87	352	5.4	3.83
603	0	61	91.5	0	0	1	1	1	0	1	76	1	84	77.4191	0	89	110	1	12.8	0	3.78	0.32	9.5	7.904	0.551	0.883	0.142	0.019	213	14.3448	386.57	57.4	29.3	1	2.65	0.66	1.63	0.56	345	6.2	2.9
604	0	40	60	0	0	0	0	0	0	0	82	1	33	99.5474	0	40	109	1	12.7	0	3.68	0.351	10.3	7.797	1.051	1.391	0.051	0.01	142	7.41865	135.109	60.7	37.6	0	2.13	0.63	0.83	1.11	124	7.1	3.23
605	0	60.3	90.45	0	0	0	0	0	1	1	83	1	158	34.3376	1	123	98	1	12	0	3.29	0.299	10.7	10.186	0.396	0.107	0	0.011	263	25.7222	664.141	60.6	25.6	1	2.43	0.84	1.38	0.35	456	8.5	4.44
606	0	61	91.5	0	0	0	0	1	0	0	48	0	51	109.536	0	68	159	0	13	0	5.54	0.471	7.5	4.867	2.07	0.412	0.12	0.03	239	2.35121	115.459	70.7	39.7	0	5.52	5.4	1.32	1.08	291	4.6	2.71
607	0	60.8	91.2	0	0	0	0	0	0	1	71	1	45	108.226	0	56	142	0	13.7	0	4.43	0.438	13.8	11.827	1.214	0.731	0	0.028	243	9.74217	200.165	68	36.2	0	6.4	1.11	4.18	1.4	307	5.8	3.46
1	1	68.5	102.75	0	0	0	0	0	0	1	52	0	145	47.3616	1	211	119	1	13.1	0	4.31	0.359	11.6	7.958	2.216	1.276	0.116	0.035	248	3.59116	111.913	77.9	41.9	0	3.27	0.79	1.92	1.04	521	4.5	3.61
2	1	75	112.5	0	1	0	0	0	1	1	80	1	208	25.1513	1	482	100	1	14.7	0	3.71	0.318	6.3	4.675	0.876	0.687	0.05	0.013	236	5.33676	269.406	66.9	37.8	0	5.63	1.59	3.79	0.62	543	4.9	3
3	1	47	70.5	0	0	0	0	0	0	1	84	1	115	50.0625	1	157	103	1	13.2	0	3.36	0.313	4.1	2.665	0.865	0.471	0.07	0.029	288	3.08092	332.948	69.3	31.9	1	3.53	0.6	1.54	0.84	357	5.3	4.2
4	1	79	118.5	1	0	1	0	1	1	1	81	1	85	73.6853	0	119	83	1	18.5	1	4.47	0.277	5.7	3	1.7	0.7	0.3	0	263	1.76471	154.706	69.2	38	0	3.49	1.7	1.26	0.76	415	6.8	4.52
5	1	78	117	0	0	0	0	0	1	1	55	0	92	80.3801	0	131	125	0	14.6	0	4.36	0.402	5.3	2.714	1.956	0.556	0.053	0.021	227	1.38753	116.053	72.2	34.5	1	4.22	0.61	2.49	1.14	316	5.3	4.02
6	1	52	78	0	0	0	0	0	0	0	70	1	73	72.1169	0	107	119	1	15.3	1	3.91	0.375	5.4	2.873	1.647	0.664	0.173	0.049	183	1.74438	111.111	70.2	39.1	0	6.29	1.28	3.76	0.73	220	6	3.51
7	1	40.5	60.75	1	0	1	0	0	1	1	59	0	95	75.1791	0	136	72	1	15.9	1	2.98	0.238	8	5.776	1.24	0.92	0.04	0.024	330	4.65806	266.129	58.5	19.7	1	3.31	1.47	1.88	0.51	397	7.7	4.41
8	1	69	103.5	0	1	1	0	1	1	1	74	1	160	36.0265	1	208	150	0	18.1	1	4.98	0.477	4.5	3.1	0.8	0.5	0.1	0.1	102	3.875	127.5	62.8	31.1	1	3.56	1.09	2.32	0.49	922	4.9	3.36
9	1	41	61.5	1	1	1	1	1	0	0	64	0	79	68.3703	0	105	93	1	14.7	0	3.42	0.288	4.9	2.989	1.455	0.436	0	0.02	158	2.0543	108.591	99.5	35.7	0	4.92	3.84	2.87	1.02	615	5.4	3.92
10	1	61.9	92.85	0	1	0	0	0	1	1	72	1	220	24.8608	1	324	80	1	21.4	1	2.11	0.242	8.5	6.231	0.518	1.607	0.068	0.076	454	12.029	876.448	69.1	33.9	1	4.74	1.76	2.88	1.32	424	4.7	4.35
11	1	38	57	0	0	0	0	0	0	0	86	1	93	48.0935	1	132	73	1	15.1	1	2.62	0.236	7.8	5.702	0.975	0.445	0.655	0.023	395	5.84821	405.128	58.8	25.1	1	3.35	0.71	2.04	0.83	288	4.3	3.94
12	1	60	90	0	0	0	0	0	1	1	76	1	94	67.5757	0	139	138	0	13.9	0	4.43	0.452	4.4	3.634	0.559	0.198	0	0.009	154	6.50089	275.492	63.6	27.6	1	3.04	0.58	1.43	1.07	357	9.9	3.87
13	1	46	69	0	1	0	1	0	1	1	79	1	137	41.9618	1	222	112	1	14	0	3.92	0.35	10.2	8.527	0.816	0.765	0.051	0.041	430	10.4498	526.961	72.7	33.2	1	4.99	1.22	2.8	0.94	536	6.2	4.64
14	1	64	96	0	0	0	0	0	1	1	72	1	85	78.4942	0	180	145	0	15.6	1	4.96	0.449	6.4	3.488	2.259	0.55	0.083	0.019	152	1.54405	67.2864	60.3	31.7	1	6.28	1.34	3.78	1.27	475	5.4	3.87
15	1	58	87	1	1	0	1	1	0	0	68	1	95	53.1897	1	118	125	0	15.7	1	4.86	0.385	7.6	4.416	2.364	0.714	0.076	0.03	238	1.86802	100.677	68.8	31.2	1	3.2	1.55	1.73	0.92	331	7.2	3.71
16	1	50.4	75.6	0	1	0	0	0	0	1	84	1	79	78.3821	0	120	90	1	16	1	3.33	0.298	13	11.18	0.598	0.897	0.299	0.026	411	18.6957	687.291	59.5	24.9	1	/	/	/	/	/	4.1	4.03
17	1	52	78	0	0	0	0	0	1	1	62	0	87	81.8717	0	125	96	1	17	1	4.19	0.294	5.9	3.221	1.776	0.614	0.26	0.029	247	1.81363	139.077	64.2	34.8	1	3.41	0.71	2.35	0.55	254	5	4.27
18	1	74.5	111.75	0	1	0	0	1	0	1	68	1	107	61.12	0	114	144	0	13.4	0	4.7	0.439	7.9	4.914	2.133	0.806	0.024	0.024	239	2.3038	112.049	73.3	44.2	0	6.55	2.15	4.49	1.01	415	6.4	3.57
19	1	51.3	76.95	0	0	0	0	0	0	0	88	1	77	59.5818	1	112	93	1	16.7	1	4.06	0.307	8.6	9.724	0.673	0.878	0.103	0.023	288	14.4487	427.935	59.8	30.5	1	3.62	1.4	1.97	0.76	295	9	2.96
20	1	50	75	0	1	0	0	1	0	0	81	1	61	81.9027	0	135	147	0	13.1	0	5.06	0.475	9.8	6.272	2.577	0.735	0.157	0.059	320	2.43384	124.175	69.2	37.8	0	3.83	2.08	1.95	0.94	231	7.2	3.11
21	1	80	120	0	0	0	0	0	0	1	40	0	113	69.6558	0	119	134	0	13.1	0	4.52	0.419	8.3	5.279	1.867	0.888	0.224	0.042	207	2.82753	110.873	70	40.7	0	5.56	1.64	3.89	0.91	194	6.2	4.05
22	1	38	57	0	1	1	1	1	0	0	83	1	150	27.5575	1	239	110	1	17.5	1	4.24	0.338	7.9	5.198	0.901	0.877	0.845	0.079	134	5.76915	148.724	67.7	27.3	1	4.52	0.47	2.36	1.01	320	4.5	3.75
23	1	50	75	0	0	0	0	0	0	0	55	0	86	65.7275	0	133	109	1	15.3	1	5.19	0.358	7.5	3.96	2.482	0.645	0.255	0.158	370	1.59549	149.073	76.3	39.8	0	5.5	2.85	3.6	1.03	349	4.7	4.66
24	1	48	72	0	0	0	0	0	0	1	60	0	124	54.0963	1	170	139	0	12.7	0	4.37	0.416	5.2	3.468	1.014	0.515	0.14	0.062	225	3.42012	221.893	67.4	33.6	1	3.91	1.09	2.24	1.3	435	4.4	4.2
25	1	60	90	0	1	0	0	0	1	1	78	1	103	59.6596	1	143	167	0	13.1	0	4.85	0.48	12.2	9.26	1.647	1.269	0.012	0.012	107	5.62234	64.9666	64.4	39.7	0	3.92	0.82	2.02	1.8	259	6.2	3.56
